# Supplementary material for: Effectiveness of BNT162b2 XBB vaccine in the US Veterans Affairs Healthcare System
Source: PubMed Central journal article supplement — Nat Commun. 2024 Nov 2;15:9490. doi: 10.1038/s41467-024-53842-w (PMC11531596; doi:10.1038/s41467-024-53842-w), 2024-11-02
Supplement: 41467_2024_53842_MOESM1_ESM.pdf [file 41467_2024_53842_MOESM1_ESM.pdf]

**Supplemental Information for Effectiveness of BNT162b2 XBB vaccine in the US Veterans  
Affairs Healthcare System**

Aisling R. Caffrey, PhD, MS; Haley J. Appaneal, PharmD, PhD; Vrishali V. Lopes, MS; Laura  
Puzniak, PhD; Evan J. Zasowski, PharmD, MPH; Luis Jodar, PhD; Kerry L. LaPlante, PharmD;  
John M. McLaughlin, PhD

**Supplemental Table 1.** Acute respiratory infection diagnosis codes (ICD-10)

| ICD-10 Code | Diagnosis                                                                                                  |
|-------------|------------------------------------------------------------------------------------------------------------|
| A22.1       | Pulmonary anthrax                                                                                          |
| A37.00      | Whooping cough due to <i>Bordetella pertussis</i> without pneumonia                                        |
| A37.01      | Whooping cough due to <i>Bordetella pertussis</i> with pneumonia                                           |
| A37.10      | Whooping cough due to <i>Bordetella parapertussis</i> without pneumonia                                    |
| A37.11      | Whooping cough due to <i>Bordetella parapertussis</i> with pneumonia                                       |
| A37.80      | Whooping cough due to other <i>Bordetella</i> species without pneumonia                                    |
| A37.81      | Whooping cough due to other <i>Bordetella</i> species with pneumonia                                       |
| A37.90      | Whooping cough, unspecified species without pneumonia                                                      |
| A37.91      | Whooping cough, unspecified species with pneumonia                                                         |
| A48.1       | Legionnaires' disease                                                                                      |
| B25.0       | Cytomegaloviral pneumonitis                                                                                |
| B34.2       | Coronavirus infection, unspecified                                                                         |
| B44.0       | Invasive pulmonary aspergillosis                                                                           |
| B77.81      | Ascariasis pneumonia                                                                                       |
| B97.29      | Other coronavirus as the cause of diseases classified elsewhere                                            |
| J00*        | Acute nasopharyngitis [common cold]                                                                        |
| J01*        | Acute sinusitis                                                                                            |
| J02*        | Acute pharyngitis                                                                                          |
| J03*        | Acute tonsillitis                                                                                          |
| J04*        | Acute laryngitis and tracheitis                                                                            |
| J05*        | Acute obstructive laryngitis [croup] and epiglottitis                                                      |
| J06*        | Acute upper respiratory infections of multiple and unspecified sites                                       |
| J09.X1      | Influenza due to novel influenza A virus with pneumonia                                                    |
| J09.X2      | Influenza due to identified novel influenza A virus with other respiratory manifestations                  |
| J09.X3      | Influenza due to identified novel influenza A virus with gastrointestinal manifestations                   |
| J09.X9      | Influenza due to identified novel influenza A virus with other manifestations                              |
| J10.00      | Influenza due to other identified influenza virus with pneumonia                                           |
| J10.01      | Influenza due to other identified influenza virus with the same other identified influenza virus pneumonia |
| J10.08      | Influenza due to other identified influenza virus with other specified pneumonia                           |
| J10.1       | Influenza due to other identified influenza virus with other respiratory manifestations                    |
| J10.2       | Influenza due to other identified influenza virus with gastrointestinal manifestations                     |
| J10.8*      | Influenza due to other identified influenza virus with other manifestations                                |
| J10.81      | Influenza due to other identified influenza virus with encephalopathy                                      |
| J10.82      | Influenza due to other identified influenza virus with myocarditis                                         |
| J10.83      | Influenza due to other identified influenza virus with otitis media                                        |
| J10.89      | Influenza due to other identified influenza virus with other manifestations                                |
| J11.00      | Influenza due to unidentified influenza virus with pneumonia                                               |
| J11.08      | Influenza due to unidentified influenza virus with specified pneumonia                                     |
| J11.1       | Influenza due to unidentified influenza virus with other respiratory manifestations                        |
| J11.2       | Influenza due to unidentified influenza virus with gastrointestinal manifestations                         |
| J11.81      | Influenza due to unidentified influenza virus with encephalopathy                                          |
| J11.82      | Influenza due to unidentified influenza virus with myocarditis                                             |
| J11.83      | Influenza due to unidentified influenza virus with otitis media                                            |
| J11.89      | Influenza due to unidentified influenza virus with other manifestations                                    |
| J12.0       | Adenoviral pneumonia                                                                                       |
| J12.1       | Respiratory syncytial virus pneumonia                                                                      |
| J12.2       | Parainfluenza virus pneumonia                                                                              |
| J12.3       | Human metapneumovirus pneumonia                                                                            |
| J12.81      | Pneumonia due to SARS-associated coronavirus                                                               |
| J12.82      | Pneumonia due to coronavirus disease 2019                                                                  |
| J12.89      | Other viral pneumonia                                                                                      |
| J12.9       | Viral pneumonia, unspecified                                                                               |
| J13         | Pneumonia due to <i>Streptococcus pneumoniae</i>                                                           |
| J14         | Pneumonia due to <i>Hemophilus influenzae</i>                                                              |

| ICD-10 Code | Diagnosis                                                                 |
|-------------|---------------------------------------------------------------------------|
| J15.0       | Pneumonia due to <i>Klebsiella pneumoniae</i>                             |
| J15.1       | Pneumonia due to Pseudomonas                                              |
| J15.20      | Pneumonia due to Staphylococcus, unspecified                              |
| J15.211     | Pneumonia due to methicillin susceptible <i>Staphylococcus aureus</i>     |
| J15.212     | Pneumonia due to methicillin resistant <i>Staphylococcus aureus</i>       |
| J.15.29     | Pneumonia due to other Staphylococcus                                     |
| J15.3       | Pneumonia due to Streptococcus, group b                                   |
| J15.4       | Pneumonia due to other Streptococci                                       |
| J15.5       | Pneumonia due to <i>Escherichia coli</i>                                  |
| J15.6       | Pneumonia due to other aerobic gram-negative bacteria                     |
| J15.7       | Pneumonia due to <i>Mycoplasma pneumoniae</i>                             |
| J15.8       | Pneumonia due to other specified bacteria                                 |
| J15.9       | Unspecified bacterial pneumonia                                           |
| J16.0       | Chlamydial pneumonia                                                      |
| J16.8       | Pneumonia due to other specified infectious organisms                     |
| J17         | Pneumonia in diseases classified elsewhere                                |
| J18.0       | Bronchopneumonia, unspecified organism                                    |
| J18.1       | Lobar pneumonia, unspecified organism                                     |
| J18.2       | Hypostatic pneumonia, unspecified organism                                |
| J18.8       | Other pneumonia, unspecified organism                                     |
| J18.9       | Pneumonia, unspecified organism                                           |
| J20.0       | Acute bronchitis due to <i>Mycoplasma pneumoniae</i>                      |
| J20.1       | Acute bronchitis due to <i>Hemophilus influenzae</i>                      |
| J20.2       | Acute bronchitis due to Streptococcus                                     |
| J20.3       | Acute bronchitis due to coxsackievirus                                    |
| J20.4       | Acute bronchitis due to parainfluenza virus                               |
| J20.5       | Acute bronchitis due to respiratory syncytial virus                       |
| J20.6       | Acute bronchitis due to rhinovirus                                        |
| J20.7       | Acute bronchitis due to echovirus                                         |
| J20.8       | Acute bronchitis due to other specified organisms                         |
| J20.9       | Acute bronchitis, unspecified                                             |
| J21.*       | Acute bronchiolitis                                                       |
| J21.0       | Acute bronchiolitis due to respiratory syncytial virus                    |
| J21.1       | Acute bronchiolitis due to human metapneumovirus                          |
| J21.8       | Acute bronchiolitis due to other specified organisms                      |
| J21.9       | Acute bronchiolitis, unspecified                                          |
| J22         | Unspecified acute lower respiratory infection                             |
| J80         | Acute respiratory distress syndrome                                       |
| J96.00      | Acute respiratory failure unspecified whether with hypoxia or hypercapnia |
| J96.01      | Acute respiratory failure with hypoxia                                    |
| J96.02      | Acute respiratory failure with hypercapnia                                |
| J96.10      | Chronic respiratory failure, unspecified with hypoxia or hypercapnia      |
| J96.11      | Chronic respiratory failure with hypoxia                                  |
| J96.12      | Chronic respiratory failure with hypercapnia                              |
| J96.20      | Acute and chr resp failure, unspecified with hypoxia or hypercapnia       |
| J96.21      | Acute and chronic respiratory failure with hypoxia                        |
| J96.22      | Acute and chronic respiratory failure with hypercapnia                    |
| J96.90      | Respiratory failure, unspecified, unspecified with hypoxia or hypercapnia |
| J96.91      | Respiratory failure, unspecified with hypoxia                             |
| J96.92      | Respiratory failure, unspecified with hypercapnia                         |
| M35.81      | Multisystem inflammatory syndrome                                         |
| R04.2       | Hemoptysis                                                                |
| R05         | Cough                                                                     |
| R05.1       | Acute cough                                                               |
| R05.2       | Subacute cough                                                            |
| R05.3       | Chronic cough                                                             |
| R05.4       | Cough syncope                                                             |

| <b>ICD-10 Code</b> | <b>Diagnosis</b>                                      |
|--------------------|-------------------------------------------------------|
| R05.8              | Other specified cough                                 |
| R05.9              | Cough, unspecified                                    |
| R06.00             | Dyspnea/abnormalities of breathing unspecified        |
| R06.02             | Shortness of breath                                   |
| R06.03             | Acute respiratory distress                            |
| R06.09             | Other forms of dyspnea                                |
| R06.1              | Stridor                                               |
| R06.82             | Tachypnea, not elsewhere classified                   |
| R06.89             | Other abnormalities of breathing                      |
| R07.1              | Chest pain on breathing                               |
| R09.0*             | Asphyxia and hypoxemia                                |
| R09.01             | Asphyxia                                              |
| R09.02             | Hypoxemia                                             |
| R09.1              | Pleurisy                                              |
| R09.2              | Respiratory arrest                                    |
| R50.9              | Fever, unspecified                                    |
| U04*               | SARS (WHO 2019)                                       |
| u04.9              | SARS, unspecified (WHO 2019)                          |
| U07.1              | COVID-19                                              |
| U07.2              | COVID-19, virus not identified (clinically diagnosed) |

**Supplemental Table 2.** Medical history of acute respiratory infection episodes (hospitalization, ED/UC visits, outpatient visits) with SARS-CoV-2 testing, by COVID-19 case-control status

|                                                          | <b>Total<br/>(n=113,174)</b> | <b>Test-<br/>positive<br/>COVID-19<br/>cases<br/>(n=20,523)</b> | <b>Test-<br/>negative<br/>controls<br/>(n=92,651)</b> | <b>P-value</b> |
|----------------------------------------------------------|------------------------------|-----------------------------------------------------------------|-------------------------------------------------------|----------------|
| Medical History                                          |                              |                                                                 |                                                       | 0.015          |
| Acute cerebrovascular disease                            | 5,372 (4.7)                  | 907 (4.4)                                                       | 4,465 (4.8)                                           |                |
| Acute myocardial infarction                              | 3,842 (3.4)                  | 533 (2.6)                                                       | 3,309 (3.6)                                           | <0.001         |
| Alcohol and substance related disorders                  | 28,011 (24.8)                | 4,657 (22.7)                                                    | 23,354 (25.2)                                         | <0.001         |
| Any cancer or malignancy                                 | 42,527 (37.6)                | 7,452 (36.3)                                                    | 35,075 (37.9)                                         | <0.001         |
| Aortic and peripheral arterial embolism or thrombosis    | 440 (0.4)                    | 51 (0.2)                                                        | 389 (0.4)                                             | <0.001         |
| Asthma                                                   | 10,024 (8.9)                 | 1,516 (7.4)                                                     | 8,508 (9.2)                                           | <0.001         |
| Benign prostatic hyperplasia                             | 23,037 (20.4)                | 3,930 (19.1)                                                    | 19,107 (20.6)                                         | <0.001         |
| Cardiac dysrhythmias                                     | 27,478 (24.3)                | 4,439 (21.6)                                                    | 23,039 (24.9)                                         | <0.001         |
| Chronic kidney disease                                   | 13,161 (11.6)                | 2,165 (10.5)                                                    | 10,996 (11.9)                                         | <0.001         |
| Chronic obstructive pulmonary disease and bronchiectasis | 26,259 (23.2)                | 3,381 (16.5)                                                    | 22,878 (24.7)                                         | <0.001         |
| Congestive heart failure                                 | 17,429 (15.4)                | 2,343 (11.4)                                                    | 15,086 (16.3)                                         | <0.001         |

|                                                   | <b>Total<br/>(n=113,174)</b> | <b>Test-<br/>positive<br/>COVID-19<br/>cases<br/>(n=20,523)</b> | <b>Test-<br/>negative<br/>controls<br/>(n=92,651)</b> | <b>P-value</b> |
|---------------------------------------------------|------------------------------|-----------------------------------------------------------------|-------------------------------------------------------|----------------|
| Coronary atherosclerosis and other heart disease  | 25,404 (22.4)                | 4,098 (20.0)                                                    | 21,306 (23.0)                                         | <0.001         |
| Delirium, dementia, and other cognitive disorders | 9,559 (8.4)                  | 1,684 (8.2)                                                     | 7,875 (8.5)                                           | 0.170          |
| Diabetes with or without chronic complications    | 47,147 (41.7)                | 8,376 (40.8)                                                    | 38,771 (41.8)                                         | 0.007          |
| Epilepsy                                          | 3,142 (2.8)                  | 525 (2.6)                                                       | 2,617 (2.8)                                           | 0.036          |
| Human immunodeficiency virus (HIV) infection      | 1,271 (1.1)                  | 181 (0.9)                                                       | 1,090 (1.2)                                           | <0.001         |
| Hypertension                                      | 66,411 (58.7)                | 11,722<br>(57.1)                                                | 54,689 (59.0)                                         | <0.001         |
| Influenza                                         | 1,413 (1.2)                  | 262 (1.3)                                                       | 1,151 (1.2)                                           | 0.689          |
| Liver diseases                                    | 10,877 (9.6)                 | 1,862 (9.1)                                                     | 9,015 (9.7)                                           | 0.004          |
| Mental health conditions                          | 57,479 (50.8)                | 10,305<br>(50.2)                                                | 47,174 (50.9)                                         | 0.068          |
| Osteoarthritis                                    | 23,617 (20.9)                | 4,320 (21.0)                                                    | 19,297 (20.8)                                         | 0.479          |
| Peripheral and visceral atherosclerosis           | 9,699 (8.6)                  | 1,547 (7.5)                                                     | 8,152 (8.8)                                           | <0.001         |
| Pneumonia                                         | 9,596 (8.5)                  | 1,156 (5.6)                                                     | 8,440 (9.1)                                           | <0.001         |
| Pulmonary heart disease                           | 7,598 (6.7)                  | 974 (4.7)                                                       | 6,624 (7.1)                                           | <0.001         |

|                      | <b>Total<br/>(n=113,174)</b> | <b>Test-<br/>positive<br/>COVID-19<br/>cases<br/>(n=20,523)</b> | <b>Test-<br/>negative<br/>controls<br/>(n=92,651)</b> | <b>P-value</b> |
|----------------------|------------------------------|-----------------------------------------------------------------|-------------------------------------------------------|----------------|
| Rheumatoid arthritis | 2,273 (2.0)                  | 367 (1.8)                                                       | 1,906 (2.1)                                           | 0.013          |
| Septicemia           | 4,805 (4.2)                  | 654 (3.2)                                                       | 4,151 (4.5)                                           | <0.001         |
| Thyroid disorder     | 14,098 (12.5)                | 2,450 (11.9)                                                    | 11,648 (12.6)                                         | 0.013          |
| Tuberculosis         | 237 (0.2)                    | 31 (0.2)                                                        | 206 (0.2)                                             | 0.043          |

ARI= acute respiratory infection; ED/UC= emergency department/urgent care; VA= Veterans Affairs

Data are n (%) unless otherwise specified.

All ARI encounters within a 30-day window were considered a single ARI episode. If multiple encounter types occurred during the 30-day window, the highest level of care was used (hospitalization > ED/UC > outpatient).

Medical history included underlying conditions and diagnoses in the year prior to the ARI episode, identified using international classification of diseases (ICD)-10 codes.

**Supplemental Table 3.** Demographics and clinical characteristics of acute respiratory infection hospitalizations with SARS-CoV-2 testing, by COVID-19 case-control status

|                                                                              | <b>Total<br/>(n=24,206)</b> | <b>Test-<br/>positive<br/>COVID-19<br/>cases<br/>(n=4,561)</b> | <b>Test-<br/>negative<br/>controls<br/>(n=19,645)</b> | <b>P-value</b> |
|------------------------------------------------------------------------------|-----------------------------|----------------------------------------------------------------|-------------------------------------------------------|----------------|
| COVID vaccine status*                                                        |                             |                                                                |                                                       | <0.001         |
| ≥1 dose of BNT162b2 XBB vaccine                                              | 1,836 (7.6)                 | 257 (5.6)                                                      | 1,579 (8.0)                                           |                |
| ≥1 dose of BA.4/5-adapted bivalent vaccine                                   | 7,816 (32.3)                | 1,443 (31.6)                                                   | 6,373 (32.4)                                          | 0.296          |
| ≥3 doses of original wild-type mRNA vaccine but no bivalent-adapted vaccines | 6,812 (28.1)                | 1,263 (27.7)                                                   | 5,549 (28.2)                                          | 0.453          |
| ≥2 doses of original wild-type mRNA vaccine but no bivalent-adapted vaccines | 10,711 (44.3)               | 1,966 (43.1)                                                   | 8,745 (44.5)                                          | 0.084          |
| No original wild-type mRNA or bivalent-adapted or non-mRNA vaccines          | 4,350 (18.0)                | 912 (20.0)                                                     | 3,438 (17.5)                                          | <0.001         |
| Time since last non-XBB adapted vaccine, median days (IQR)                   | 595 (392-784)               | 601 (397-789)                                                  | 594 (390-783)                                         | 0.046          |
| Age group                                                                    | 5,438 (22.5)                | 1,083 (23.7)                                                   | 4,355 (22.2)                                          | <0.001         |



|                                               | <b>Total<br/>(n=24,206)</b> | <b>Test-<br/>positive<br/>COVID-19<br/>cases<br/>(n=4,561)</b> | <b>Test-<br/>negative<br/>controls<br/>(n=19,645)</b> | <b>P-value</b> |
|-----------------------------------------------|-----------------------------|----------------------------------------------------------------|-------------------------------------------------------|----------------|
| 18–64 years                                   |                             |                                                                |                                                       |                |
| 65–74 years                                   | 7,676 (31.7)                | 1,289 (28.3)                                                   | 6,387 (32.5)                                          |                |
| ≥75 years                                     | 11,092 (45.8)               | 2,189 (48.0)                                                   | 8,903 (45.3)                                          |                |
| Sex                                           | 22,770 (94.1)               | 4,290 (94.1)                                                   | 18,480 (94.1)                                         | 0.977          |
| Male                                          |                             |                                                                |                                                       |                |
| Female                                        | 1,436 (5.9)                 | 271 (5.9)                                                      | 1,165 (5.9)                                           |                |
| Body mass index category                      |                             |                                                                |                                                       | 0.002          |
| Underweight (<18.5 kg/m <sup>2</sup> )        | 801 (3.3)                   | 117 (2.6)                                                      | 684 (3.5)                                             |                |
| Healthy weight (18.5–24.9 kg/m <sup>2</sup> ) | 10,234 (42.3)               | 2,021 (44.3)                                                   | 8,213 (41.8)                                          |                |
| Overweight (25–29.9 kg/m <sup>2</sup> )       | 4,338 (17.9)                | 868 (19.0)                                                     | 3,470 (17.7)                                          |                |
| Obese (≥30 kg/m <sup>2</sup> )                | 8,801 (36.4)                | 1,542 (33.8)                                                   | 7,259 (37.0)                                          |                |
| Missing                                       | 32 (0.1)                    | 13 (0.3)                                                       | 19 (0.1)                                              |                |
| Region                                        |                             |                                                                |                                                       | <0.001         |
| Midwest                                       | 4,439 (18.3)                | 980 (21.5)                                                     | 3,459 (17.6)                                          |                |
| Northeast                                     | 3,113 (12.9)                | 698 (15.3)                                                     | 2,415 (12.3)                                          |                |
| West                                          | 5,457 (22.5)                | 1,025 (22.5)                                                   | 4,432 (22.6)                                          |                |
| South                                         | 11,197 (46.3)               | 1,858 (40.7)                                                   | 9,339 (47.5)                                          |                |
| Race                                          |                             |                                                                |                                                       | 0.064          |
| Black or African American                     | 5,699 (23.5)                | 1,033 (22.6)                                                   | 4,666 (23.8)                                          |                |

|                               | <b>Total<br/>(n=24,206)</b> | <b>Test-<br/>positive<br/>COVID-19<br/>cases<br/>(n=4,561)</b> | <b>Test-<br/>negative<br/>controls<br/>(n=19,645)</b> | <b>P-value</b> |
|-------------------------------|-----------------------------|----------------------------------------------------------------|-------------------------------------------------------|----------------|
| White                         | 16,277 (67.2)               | 3,073 (67.4)                                                   | 13,204 (67.2)                                         |                |
| Other race                    | 2,230 (9.2)                 | 455 (10.0)                                                     | 1,775 (9.0)                                           |                |
| Ethnicity                     |                             |                                                                |                                                       | 0.698          |
| Hispanic or Latino            | 1,768 (7.3)                 | 327 (7.2)                                                      | 1,441 (7.3)                                           |                |
| Not Hispanic or Latino        | 22,438 (92.7)               | 4,234 (92.8)                                                   | 18,204 (92.7)                                         |                |
| Smoking                       |                             |                                                                |                                                       | <0.001         |
| Current or former             | 14,803 (61.2)               | 2,586 (56.7)                                                   | 12,217 (62.2)                                         |                |
| Never smoked                  | 5,736 (23.7)                | 1,260 (27.6)                                                   | 4,476 (22.8)                                          |                |
| Unknown                       | 3,667 (15.1)                | 715 (15.7)                                                     | 2,952 (15.0)                                          |                |
| Area deprivation index (ADI)* |                             |                                                                |                                                       | 0.033          |
| Quintile                      |                             |                                                                |                                                       |                |
| 1 (Least Deprived)            | 4,506 (18.6)                | 913 (20.0)                                                     | 3,593 (18.3)                                          |                |
| 2                             | 4,398 (18.2)                | 853 (18.7)                                                     | 3,545 (18.0)                                          |                |
| 3                             | 4,611 (19.1)                | 868 (19.0)                                                     | 3,743 (19.1)                                          |                |
| 4                             | 4,759 (19.7)                | 874 (19.2)                                                     | 3,885 (19.8)                                          |                |
| 5 (Most Deprived)             | 5,284 (21.8)                | 939 (20.6)                                                     | 4,345 (22.1)                                          |                |
| Missing                       | 648 (2.7)                   | 114 (2.5)                                                      | 534 (2.7)                                             |                |
| VA Frailty index (VA-FI)**    |                             |                                                                |                                                       | 0.025          |
| Non-frail (VA-FI ≤0.1)        | 3,557 (14.7)                | 720 (15.8)                                                     | 2,837 (14.4)                                          |                |
| Pre-frail (VA-FI >0.1-0.2)    | 4,679 (19.3)                | 873 (19.1)                                                     | 3,806 (19.4)                                          |                |

|                                    | <b>Total<br/>(n=24,206)</b> | <b>Test-<br/>positive<br/>COVID-19<br/>cases<br/>(n=4,561)</b> | <b>Test-<br/>negative<br/>controls<br/>(n=19,645)</b> | <b>P-value</b> |
|------------------------------------|-----------------------------|----------------------------------------------------------------|-------------------------------------------------------|----------------|
| Mildly frail (VA-FI >0.2-0.3)      | 5,024 (20.8)                | 989 (21.7)                                                     | 4,035 (20.5)                                          |                |
| Moderately frail (VA-FI >0.3-0.4)  | 4,508 (18.6)                | 815 (17.9)                                                     | 3,693 (18.8)                                          |                |
| Severely frail (VA-FI $\geq$ 0.5)  | 6,438 (26.6)                | 1,164 (25.5)                                                   | 5,274 (26.8)                                          |                |
| Healthcare exposures, 1 year prior |                             |                                                                |                                                       | 0.180          |
| Hospital admission                 | 12,317 (15.9)               | 2,280 (50.0)                                                   | 10,037 (51.1)                                         |                |
| Nursing home admission             | 1,273 (5.3)                 | 345 (7.6)                                                      | 928 (4.7)                                             | <0.001         |
| Intensive care unit admission      | 3,633 (15.0)                | 631 (13.8)                                                     | 3,002 (15.3)                                          | 0.014          |
| Emergency department visit         | 17,664 (73.0)               | 3,254 (71.3)                                                   | 14,410 (73.4)                                         | 0.006          |
| Primary care visit                 | 22,931 (94.7)               | 4,300 (94.3)                                                   | 18,631 (94.8)                                         | 0.127          |
| Charlson Comorbidity Index         |                             |                                                                |                                                       | <0.001         |
| 0                                  | 3,007 (12.4)                | 733 (16.1)                                                     | 2,274 (11.6)                                          |                |
| 1                                  | 3,701 (15.3)                | 674 (14.8)                                                     | 3,027 (15.4)                                          |                |
| 2                                  | 3,179 (13.1)                | 580 (12.7)                                                     | 2,599 (13.2)                                          |                |
| 3                                  | 3,002 (12.4)                | 560 (12.3)                                                     | 2,442 (12.4)                                          |                |
| $\geq$ 4                           | 11,317 (46.8)               | 2,014 (44.2)                                                   | 9,303 (47.4)                                          |                |
| Immunocompromised***               | 10,422 (43.1)               | 1,507 (33.0)                                                   | 8,915 (45.4)                                          | <0.001         |
| Week of infection                  |                             |                                                                |                                                       | <0.001         |
| Sep 25–Sep 30,2023                 | 1,161 (4.8)                 | 163 (3.6)                                                      | 998 (5.1)                                             |                |

|                              | <b>Total<br/>(n=24,206)</b> | <b>Test-<br/>positive<br/>COVID-19<br/>cases<br/>(n=4,561)</b> | <b>Test-<br/>negative<br/>controls<br/>(n=19,645)</b> | <b>P-value</b> |
|------------------------------|-----------------------------|----------------------------------------------------------------|-------------------------------------------------------|----------------|
| Oct 01–Oct 07, 2023          | 1,231 (5.1)                 | 186 (4.1)                                                      | 1,045 (5.3)                                           |                |
| Oct 08–Oct 14, 2023          | 1,132 (4.7)                 | 176 (3.9)                                                      | 956 (4.9)                                             |                |
| Oct 15–Oct 21, 2023          | 1,274 (5.3)                 | 210 (4.6)                                                      | 1,064 (5.4)                                           |                |
| Oct 22–Oct 28, 2023          | 1,160 (4.8)                 | 178 (3.9)                                                      | 982 (5.0)                                             |                |
| Oct 29–Nov 04, 2023          | 1,053 (4.3)                 | 156 (3.4)                                                      | 897 (4.6)                                             |                |
| Nov 05–Nov 11, 2023          | 1,202 (5.0)                 | 195 (4.3)                                                      | 1,007 (5.1)                                           |                |
| Nov 12–Nov 18, 2023          | 1,311 (5.4)                 | 261 (5.7)                                                      | 1,050 (5.3)                                           |                |
| Nov 19–Nov 25, 2023          | 1,160 (4.8)                 | 241 (5.3)                                                      | 919 (4.7)                                             |                |
| Nov 26–Dec 02, 2023          | 1,392 (5.7)                 | 240 (5.3)                                                      | 1,152 (5.9)                                           |                |
| Dec 03–Dec 09, 2023          | 1,508 (6.2)                 | 301 (6.6)                                                      | 1,207 (6.1)                                           |                |
| Dec 10–Dec 16, 2023          | 1,370 (6.0)                 | 257 (5.6)                                                      | 1,113 (5.7)                                           |                |
| Dec 17–Dec 23, 2023          | 1,473 (6.1)                 | 290 (6.4)                                                      | 1,183 (6.0)                                           |                |
| Dec 24–Dec 30, 2023          | 1,521 (6.3)                 | 348 (7.6)                                                      | 1,173 (6.0)                                           |                |
| Dec 31, 2023–Jan 06, 2024    | 1,693 (7.0)                 | 360 (7.9)                                                      | 1,333 (6.8)                                           |                |
| Jan 07–Jan 13, 2024          | 1,537 (6.4)                 | 357 (7.8)                                                      | 1,180 (6.0)                                           |                |
| Jan 14–Jan 20, 2024          | 1,225 (5.1)                 | 250 (5.5)                                                      | 975 (5.0)                                             |                |
| Jan 21–Jan 27, 2024          | 1,191 (4.9)                 | 272 (6.0)                                                      | 919 (4.7)                                             |                |
| Jan 28–Jan 31, 2024          | 612 (2.5)                   | 120 (2.6)                                                      | 492 (2.5)                                             |                |
| Prior COVID-19 infection**** | 6,070 (25.1)                | 880 (19.3)                                                     | 5,190 (26.4)                                          | <0.001         |

|                                        | <b>Total<br/>(n=24,206)</b> | <b>Test-<br/>positive<br/>COVID-19<br/>cases<br/>(n=4,561)</b> | <b>Test-<br/>negative<br/>controls<br/>(n=19,645)</b> | <b>P-value</b> |
|----------------------------------------|-----------------------------|----------------------------------------------------------------|-------------------------------------------------------|----------------|
| ICU admission (hospitalized only)***** | 4,955 (20.5)                | 624 (13.7)                                                     | 4,331 (22.0)                                          | <0.001         |
| Current influenza vaccine              | 9,747 (40.3)                | 1,881 (41.2)                                                   | 7,866 (40.0)                                          | 0.137          |
| Pneumococcal vaccine in last 5 years   | 9,954 (41.1)                | 1,756 (38.5)                                                   | 8,198 (41.7)                                          | <0.001         |

ARI= acute respiratory infection; ED/UC= emergency department/urgent care; VA= Veterans Affairs

Data are n (%) unless otherwise specified.

All ARI encounters within a 30-day window were considered a single ARI episode. If multiple encounter types occurred during the 30-day window, the highest level of care was used (hospitalization > ED/UC > outpatient).

\*The categories under “COVID vaccine status” were categorized as present or absent for each category

\*\*Area deprivation index (ADI) is a measure of socioeconomic disadvantage and was grouped into quintiles from least to most deprived neighborhoods (based on zip code).<sup>51</sup>

\*\*\*Frailty was defined using the ICD-10 updated Veterans Affairs Frailty Index (VA-FI) and categorized as non-frail (VA-FI ≤ 0.1), prefrail (>0.1–0.2), mildly frail (>0.2–0.3), moderately frail (>0.3–0.4), and severely frail (>0.4).<sup>52</sup>

\*\*\*\*Immunocompromised status was based on immunocompromising conditions in the year prior and immunosuppressive medications in the 90 days prior to the ARI episode based on a slightly modified algorithm that has been previously described.<sup>29</sup> Unlike the previously described algorithm, we used diagnosis codes to identify solid organ or hematopoietic stem cell transplantation and HIV/AIDS versus patient registries. Consistent with the previously described algorithm, we required one inpatient or two outpatient diagnosis code for an immunocompromising condition (leukemia, lymphoma, congenital immunodeficiencies, asplenia/hyposplenia, HIV/AIDS, and organ transplant) in the year prior and any

immunosuppressive medication (alkylating agents, antibiotics, antimetabolites, antimitotics, monoclonal antibodies, other, immune-modulating agents, TNF Alpha antagonist, and steroids) with an outpatient days supply or inpatient administration in the 90 days prior.

\*\*\*\*Prior COVID-19 infection was defined as any previous documented SARS-CoV-2 infection or no prior documented infection (yes or no).

\*\*\*\*Virtual visit was only assessed among those with an outpatient visit and defined as a virtual visit or not .

\*\*\*\*ICU admission was only assessed among those with a hospital admission and defined as admission to an ICU or not.

**Supplemental Table 4.** Demographics and clinical characteristics of acute respiratory infection ED/UC visits with SARS-CoV-2 testing, by COVID-19 case-control status

|                                                                              | <b>Total<br/>(n=61,976)</b> | <b>Test-<br/>positive<br/>COVID-19<br/>cases<br/>(n=11,244)</b> | <b>Test-<br/>negative<br/>controls<br/>(n=50,732)</b> | <b>P-value</b> |
|------------------------------------------------------------------------------|-----------------------------|-----------------------------------------------------------------|-------------------------------------------------------|----------------|
| COVID vaccine status*                                                        |                             |                                                                 |                                                       | <0.001         |
| ≥1 dose of BNT162b2 XBB vaccine                                              | 3,652 (5.9)                 | 503 (4.5)                                                       | 3,149 (6.2)                                           |                |
| ≥1 dose of BA.4/5-adapted bivalent vaccine                                   | 14,756 (23.8)               | 2,682 (23.9)                                                    | 12,074 (23.8)                                         | 0.905          |
| ≥3 doses of original wild-type mRNA vaccine but no bivalent-adapted vaccines | 15,718 (25.4)               | 3,020 (26.9)                                                    | 12,698 (25.0)                                         | <0.001         |
| ≥2 doses of original wild-type mRNA vaccine but no bivalent-adapted vaccines | 28,668 (46.3)               | 5,330 (47.4)                                                    | 23,338 (46.0)                                         | 0.007          |
| No original wild-type mRNA or bivalent-adapted or non-mRNA vaccines          | 14,572 (23.5)               | 2,501 (22.2)                                                    | 12,071 (23.8)                                         | <0.001         |
| Time since last non-XBB adapted vaccine, median days (IQR)                   | 692 (427-838)               | 697 (431-841)                                                   | 691 (426-838)                                         | 0.017          |
| Age group                                                                    |                             |                                                                 |                                                       | 0.080          |

|                                               | <b>Total<br/>(n=61,976)</b> | <b>Test-<br/>positive<br/>COVID-19<br/>cases<br/>(n=11,244)</b> | <b>Test-<br/>negative<br/>controls<br/>(n=50,732)</b> | <b>P-value</b> |
|-----------------------------------------------|-----------------------------|-----------------------------------------------------------------|-------------------------------------------------------|----------------|
| 18–64 years                                   | 35,950 (58.0)               | 6,417 (57.1)                                                    | 29,533 (58.2)                                         |                |
| 65–74 years                                   | 13,544 (21.9)               | 2,502 (22.3)                                                    | 11,042 (21.8)                                         |                |
| ≥75 years                                     | 12,482 (20.1)               | 2,325 (20.7)                                                    | 10,157 (20.0)                                         |                |
| Sex                                           |                             |                                                                 |                                                       | 0.641          |
| Male                                          | 52,249 (84.3)               | 9,463 (84.2)                                                    | 42,786 (84.3)                                         |                |
| Female                                        | 9,727 (15.7)                | 1,781 (15.8)                                                    | 7,946 (15.7)                                          |                |
| Body mass index category                      |                             |                                                                 |                                                       | 0.005          |
| Underweight (<18.5 kg/m <sup>2</sup> )        | 284 (0.5)                   | 38 (0.3)                                                        | 246 (0.5)                                             |                |
| Healthy weight (18.5–24.9 kg/m <sup>2</sup> ) | 15,836 (25.5)               | 2,917 (25.9)                                                    | 12,919 (25.5)                                         |                |
| Overweight (25–29.9 kg/m <sup>2</sup> )       | 12,969 (20.9)               | 2,456 (21.8)                                                    | 10,513 (20.7)                                         |                |
| Obese (≥30 kg/m <sup>2</sup> )                | 32,549 (52.5)               | 5,779 (51.4)                                                    | 26,770 (52.8)                                         |                |
| Missing                                       | 338 (0.5)                   | 54 (0.5)                                                        | 284 (0.6)                                             |                |
| Region                                        |                             |                                                                 |                                                       | <0.001         |
| Midwest                                       | 11,847 (19.1)               | 2,402 (21.4)                                                    | 9,445 (18.6)                                          |                |
| Northeast                                     | 8,560 (13.8)                | 1,609 (14.3)                                                    | 6,951 (13.7)                                          |                |
| West                                          | 11,811 (19.1)               | 2,000 (17.8)                                                    | 9,811 (19.3)                                          |                |
| South                                         | 29,758 (48.0)               | 5,233 (46.5)                                                    | 24,525 (48.3)                                         |                |
| Race                                          |                             |                                                                 |                                                       | 0.313          |
| Black or African American                     | 17,871 (28.8)               | 3,251 (28.9)                                                    | 14,620 (28.8)                                         |                |



|                                           | <b>Total<br/>(n=61,976)</b> | <b>Test-<br/>positive<br/>COVID-19<br/>cases<br/>(n=11,244)</b> | <b>Test-<br/>negative<br/>controls<br/>(n=50,732)</b> | <b>P-value</b> |
|-------------------------------------------|-----------------------------|-----------------------------------------------------------------|-------------------------------------------------------|----------------|
| White                                     | 37,239 (60.1)               | 6,793 (60.4)                                                    | 30,446 (60.0)                                         |                |
| Other race                                | 6,866 (11.1)                | 1,200 (10.7)                                                    | 5,666 (11.2)                                          |                |
| Ethnicity                                 |                             |                                                                 |                                                       | 0.699          |
| Hispanic or Latino                        | 6,244 (10.1)                | 1,144 (10.2)                                                    | 5,100 (10.1)                                          |                |
| Not Hispanic or Latino                    | 55,732 (89.9)               | 10,100<br>(89.8)                                                | 45,632 (89.9)                                         |                |
| Smoking                                   |                             |                                                                 |                                                       | <0.001         |
| Current or former                         | 29,271 (47.2)               | 5,169 (46.0)                                                    | 24,102 (47.5)                                         |                |
| Never smoked                              | 21,978 (35.5)               | 4,156 (37.0)                                                    | 17,822 (35.1)                                         |                |
| Unknown                                   | 10,727 (17.3)               | 1,919 (17.1)                                                    | 8,808 (17.4)                                          |                |
| Area deprivation index (ADI)*<br>Quintile |                             |                                                                 |                                                       | 0.251          |
| 1 (Least Deprived)                        | 12,191 (19.7)               | 2,176 (19.4)                                                    | 10,015 (19.7)                                         |                |
| 2                                         | 12,369 (20.0)               | 2,325 (20.7)                                                    | 10,044 (19.8)                                         |                |
| 3                                         | 12,259 (19.8)               | 2,243 (19.9)                                                    | 10,016 (19.7)                                         |                |
| 4                                         | 12,128 (19.6)               | 2,199 (19.6)                                                    | 9,929 (19.6)                                          |                |
| 5 (Most Deprived)                         | 11,554 (18.6)               | 2,045 (18.2)                                                    | 9,509 (18.7)                                          |                |
| Missing                                   | 1,475 (2.4)                 | 256 (2.3)                                                       | 1,219 (2.4)                                           |                |
| VA Frailty index (VA-FI)**                |                             |                                                                 |                                                       | <0.001         |
| Non-frail (VA-FI $\leq$ 0.1)              | 27,267 (44.0)               | 5,002 (44.5)                                                    | 22,265 (43.9)                                         |                |

|                                    | <b>Total<br/>(n=61,976)</b> | <b>Test-<br/>positive<br/>COVID-19<br/>cases<br/>(n=11,244)</b> | <b>Test-<br/>negative<br/>controls<br/>(n=50,732)</b> | <b>P-value</b> |
|------------------------------------|-----------------------------|-----------------------------------------------------------------|-------------------------------------------------------|----------------|
| Pre-frail (VA-FI >0.1-0.2)         | 16,170 (26.1)               | 3,059 (27.2)                                                    | 13,111 (25.8)                                         |                |
| Mildly frail (VA-FI >0.2-0.3)      | 9,297 (15.0)                | 1,778 (15.8)                                                    | 7,519 (14.8)                                          |                |
| Moderately frail (VA-FI >0.3-0.4)  | 5,047 (8.1)                 | 822 (7.3)                                                       | 4,225 (8.3)                                           |                |
| Severely frail (VA-FI $\geq$ 0.5)  | 4,195 (6.8)                 | 583 (5.2)                                                       | 3,612 (7.1)                                           |                |
| Healthcare exposures, 1 year prior |                             |                                                                 |                                                       | <0.001         |
| Hospital admission                 | 10,609 (17.1)               | 1,617 (14.4)                                                    | 8,992 (17.7)                                          |                |
| Nursing home admission             | 1,055 (1.7)                 | 199 (1.8)                                                       | 856 (1.7)                                             | 0.54           |
| Intensive care unit admission      | 2,257 (3.6)                 | 322 (2.9)                                                       | 1,935 (3.8)                                           | <0.001         |
| Emergency department visit         | 38,318 (61.8)               | 6,734 (59.9)                                                    | 31,584 (62.3)                                         | <0.001         |
| Primary care visit                 | 58,260 (94.0)               | 10,657 (94.8)                                                   | 47,603 (93.8)                                         | <0.001         |
| Charlson Comorbidity Index         |                             |                                                                 |                                                       | <0.001         |
| 0                                  | 26,471 (42.7)               | 4,949 (44.0)                                                    | 21,522 (42.4)                                         |                |
| 1                                  | 12,891 (20.8)               | 2,414 (21.5)                                                    | 10,477 (20.7)                                         |                |
| 2                                  | 6,688 (10.8)                | 1,204 (10.7)                                                    | 5,484 (10.8)                                          |                |
| 3                                  | 5,260 (8.5)                 | 964 (8.6)                                                       | 4,296 (8.5)                                           |                |
| $\geq$ 4                           | 10,666 (17.2)               | 1,713 (15.2)                                                    | 8,953 (17.6)                                          |                |
| Immunocompromised***               | 21,762 (35.1)               | 3,236 (28.8)                                                    | 18,526 (36.5)                                         | <0.001         |

|                           | <b>Total<br/>(n=61,976)</b> | <b>Test-<br/>positive<br/>COVID-19<br/>cases<br/>(n=11,244)</b> | <b>Test-<br/>negative<br/>controls<br/>(n=50,732)</b> | <b>P-value</b> |
|---------------------------|-----------------------------|-----------------------------------------------------------------|-------------------------------------------------------|----------------|
| Week of infection         |                             |                                                                 |                                                       | <0.001         |
| Sep 25–Sep 30, 2023       | 2,095 (3.4)                 | 376 (3.3)                                                       | 1,719 (3.4)                                           |                |
| Oct 01–Oct 07, 2023       | 2,291 (3.7)                 | 360 (3.2)                                                       | 1,931 (3.8)                                           |                |
| Oct 08–Oct 14, 2023       | 2,251 (3.6)                 | 358 (3.2)                                                       | 1,893 (3.7)                                           |                |
| Oct 15–Oct 21, 2023       | 2,276 (3.7)                 | 366 (3.3)                                                       | 1,910 (3.8)                                           |                |
| Oct 22–Oct 28, 2023       | 2,318 (3.7)                 | 348 (3.1)                                                       | 1,970 (3.9)                                           |                |
| Oct 29–Nov 04, 2023       | 2,304 (3.7)                 | 342 (3.0)                                                       | 1,962 (3.9)                                           |                |
| Nov 05–Nov 11, 2023       | 2,496 (4.0)                 | 399 (3.5)                                                       | 2,097 (4.1)                                           |                |
| Nov 12–Nov 18, 2023       | 3,019 (4.9)                 | 518 (4.6)                                                       | 2,501 (4.9)                                           |                |
| Nov 19–Nov 25, 2023       | 2,957 (4.8)                 | 539 (4.8)                                                       | 2,418 (4.8)                                           |                |
| Nov 26–Dec 02, 2023       | 3,684 (5.9)                 | 629 (5.6)                                                       | 3,055 (6.0)                                           |                |
| Dec 03–Dec 09, 2023       | 3,779 (6.1)                 | 696 (6.2)                                                       | 3,083 (6.1)                                           |                |
| Dec 10–Dec 16, 2023       | 3,918 (6.3)                 | 729 (6.5)                                                       | 3,189 (6.3)                                           |                |
| Dec 17–Dec 23, 2023       | 4,874 (7.9)                 | 920 (8.2)                                                       | 3,954 (7.8)                                           |                |
| Dec 24–Dec 30, 2023       | 5,371 (8.7)                 | 1,107 (9.8)                                                     | 4,264 (8.4)                                           |                |
| Dec 31, 2023–Jan 06, 2024 | 5,332 (8.6)                 | 1,023 (9.1)                                                     | 4,309 (8.5)                                           |                |
| Jan 07–Jan 13, 2024       | 4,257 (6.9)                 | 844 (7.5)                                                       | 3,413 (6.7)                                           |                |
| Jan 14–Jan 20, 2024       | 3,139 (5.1)                 | 644 (5.7)                                                       | 2,495 (4.9)                                           |                |
| Jan 21–Jan 27, 2024       | 3,518 (5.7)                 | 674 (6.0)                                                       | 2,844 (5.6)                                           |                |

|                                      | <b>Total<br/>(n=61,976)</b> | <b>Test-<br/>positive<br/>COVID-19<br/>cases<br/>(n=11,244)</b> | <b>Test-<br/>negative<br/>controls<br/>(n=50,732)</b> | <b>P-value</b> |
|--------------------------------------|-----------------------------|-----------------------------------------------------------------|-------------------------------------------------------|----------------|
| Jan 28–Jan 31, 2024                  | 2,097 (3.4)                 | 372 (3.3)                                                       | 1,725 (3.4)                                           |                |
| Prior COVID-19 infection****         | 18,505 (29.9)               | 2,995 (26.6)                                                    | 15,510 (30.6)                                         | <0.001         |
| Current influenza vaccine            | 19,718 (31.8)               | 3,734 (33.2)                                                    | 15,984 (31.5)                                         | <0.001         |
| Pneumococcal vaccine in last 5 years | 21,138 (34.1)               | 3,771 (33.5)                                                    | 17,367 (34.2)                                         | 0.160          |

ARI= acute respiratory infection; ED/UC= emergency department/urgent care; VA= Veterans Affairs

Data are n (%) unless otherwise specified.

All ARI encounters within a 30-day window were considered a single ARI episode. If multiple encounter types occurred during the 30-day window, the highest level of care was used (hospitalization > ED/UC > outpatient).

\*The categories under “COVID vaccine status” were categorized as present or absent for each category

\*\*Area deprivation index (ADI) is a measure of socioeconomic disadvantage and was grouped into quintiles from least to most deprived neighborhoods (based on zip code).<sup>51</sup>

\*\*\*Frailty was defined using the ICD-10 updated Veterans Affairs Frailty Index (VA-FI) and categorized as non-frail (VA-FI ≤ 0.1), prefrail (>0.1–0.2), mildly frail (>0.2–0.3), moderately frail (>0.3–0.4), and severely frail (>0.4).<sup>52</sup>

\*\*\*\*Immunocompromised status was based on immunocompromising conditions in the year prior and immunosuppressive medications in the 90 days prior to the ARI episode based on a slightly modified algorithm that has been previously described.<sup>29</sup> Unlike the previously described algorithm, we used diagnosis codes to identify solid organ or hematopoietic stem cell transplantation and HIV/AIDs versus patient registries. Consistent with the previously described algorithm, we required one inpatient or two outpatient diagnosis code for an immunocompromising condition (leukemia, lymphoma, congenital immunodeficiencies, asplenia/hyposplenia, HIV/AIDS, and organ transplant) in the year prior and any immunosuppressive medication (alkylating agents, antibiotics, antimetabolites, antimitotics,

monoclonal antibodies, other, immune-modulating agents, TNF Alpha antagonist, and steroids) with an outpatient days supply or inpatient administration in the 90 days prior.

\*\*\*\*Prior COVID-19 infection was defined as any previous documented SARS-CoV-2 infection or no prior documented infection (yes or no).

\*\*\*\*Virtual visit was only assessed among those with an outpatient visit and defined as a virtual visit or not .

\*\*\*\*ICU admission was only assessed among those with a hospital admission and defined as admission to an ICU or not.

**Supplemental Table 5.** Demographics and clinical characteristics of acute respiratory infection outpatient visits with SARS-CoV-2 testing, by COVID-19 case-control status

|                                                                              | <b>Total<br/>(n=26,992)</b> | <b>Test-<br/>positive<br/>COVID-19<br/>cases<br/>(n=4,718)</b> | <b>Test-<br/>negative<br/>controls<br/>(n=22,274)</b> | <b>P-value</b> |
|------------------------------------------------------------------------------|-----------------------------|----------------------------------------------------------------|-------------------------------------------------------|----------------|
| COVID vaccine status*                                                        | 1,836 (6.8)                 | 259 (5.5)                                                      | 1,577 (7.1)                                           | <0.001         |
| ≥1 dose of BNT162b2 XBB vaccine                                              |                             |                                                                |                                                       |                |
| ≥1 dose of BA.4/5-adapted bivalent vaccine                                   | 7,335 (27.2)                | 1,191 (25.2)                                                   | 6,144 (27.6)                                          | 0.001          |
| ≥3 doses of original wild-type mRNA vaccine but no bivalent-adapted vaccines | 6,933 (25.7)                | 1,229 (26.0)                                                   | 5,704 (25.6)                                          | 0.529          |
| ≥2 doses of original wild-type mRNA vaccine but no bivalent-adapted vaccines | 12,167 (45.1)               | 2,171 (46.0)                                                   | 9,996 (44.9)                                          | 0.154          |
| No original wild-type mRNA or bivalent-adapted or non-mRNA vaccines          | 5,825 (21.6)                | 1,041 (22.1)                                                   | 4,784 (21.5)                                          | 0.374          |
| Time since last non-XBB adapted vaccine, median days (IQR)                   | 661 (409-819)               | 679 (424-837)                                                  | 657 (406-817)                                         | <0.001         |
| Age group                                                                    |                             |                                                                |                                                       | <0.001         |

|                                               | <b>Total<br/>(n=26,992)</b> | <b>Test-<br/>positive<br/>COVID-19<br/>cases<br/>(n=4,718)</b> | <b>Test-<br/>negative<br/>controls<br/>(n=22,274)</b> | <b>P-value</b> |
|-----------------------------------------------|-----------------------------|----------------------------------------------------------------|-------------------------------------------------------|----------------|
| 18–64 years                                   | 13,175 (48.8)               | 2,599 (55.1)                                                   | 10,576 (47.5)                                         |                |
| 65–74 years                                   | 6,601 (24.5)                | 1,029 (21.8)                                                   | 5,572 (25.0)                                          |                |
| ≥75 years                                     | 7,216 (26.7)                | 1,090 (23.1)                                                   | 6,126 (27.5)                                          |                |
| Sex                                           |                             |                                                                |                                                       | 0.001          |
| Male                                          | 23,153 (85.8)               | 3,977 (84.3)                                                   | 19,176 (86.1)                                         |                |
| Female                                        | 3,839 (14.2)                | 741 (15.7)                                                     | 3,098 (13.9)                                          |                |
| Body mass index category                      |                             |                                                                |                                                       | <0.001         |
| Underweight (<18.5 kg/m <sup>2</sup> )        | 314 (1.2)                   | 28 (0.6)                                                       | 286 (1.3)                                             |                |
| Healthy weight (18.5–24.9 kg/m <sup>2</sup> ) | 8,013 (29.7)                | 1,285 (27.2)                                                   | 6,728 (30.2)                                          |                |
| Overweight (25–29.9 kg/m <sup>2</sup> )       | 5,473 (20.3)                | 1,063 (22.5)                                                   | 4,410 (19.8)                                          |                |
| Obese (≥30 kg/m <sup>2</sup> )                | 13,048 (48.3)               | 2,299 (48.7)                                                   | 10,749 (48.3)                                         |                |
| Missing                                       | 144 (0.5)                   | 43 (0.9)                                                       | 101 (0.4)                                             |                |
| Region                                        |                             |                                                                |                                                       | <0.001         |
| Midwest                                       | 5,881 (21.8)                | 1,217 (25.8)                                                   | 4,664 (20.9)                                          |                |
| Northeast                                     | 3,390 (12.6)                | 633 (13.4)                                                     | 2,757 (12.4)                                          |                |
| West                                          | 4,665 (17.3)                | 762 (16.2)                                                     | 3,903 (17.5)                                          |                |
| South                                         | 13,056 (48.4)               | 2,106 (44.6)                                                   | 10,950 (49.2)                                         |                |
| Race                                          |                             |                                                                |                                                       | 0.001          |
| Black or African American                     | 6,129 (22.7)                | 1,080 (22.9)                                                   | 5,049 (22.7)                                          |                |

|                               | <b>Total<br/>(n=26,992)</b> | <b>Test-<br/>positive<br/>COVID-19<br/>cases<br/>(n=4,718)</b> | <b>Test-<br/>negative<br/>controls<br/>(n=22,274)</b> | <b>P-value</b> |
|-------------------------------|-----------------------------|----------------------------------------------------------------|-------------------------------------------------------|----------------|
| White                         | 17,829 (66.1)               | 3,039 (64.4)                                                   | 14,790 (66.4)                                         |                |
| Other race                    | 3,034 (11.2)                | 599 (12.7)                                                     | 2,435 (10.9)                                          |                |
| Ethnicity                     |                             |                                                                |                                                       | 0.724          |
| Hispanic or Latino            | 2,515 (9.3)                 | 446 (9.5)                                                      | 2,069 (9.3)                                           |                |
| Not Hispanic or Latino        | 24,477 (90.7)               | 4,272 (90.5)                                                   | 20,205 (90.7)                                         |                |
| Smoking                       |                             |                                                                |                                                       | <0.001         |
| Current or former             | 13,988 (51.8)               | 2,232 (47.3)                                                   | 11,756 (52.8)                                         |                |
| Never smoked                  | 8,856 (32.8)                | 1,690 (35.8)                                                   | 7,166 (32.2)                                          |                |
| Unknown                       | 4,148 (15.4)                | 796 (16.9)                                                     | 3,352 (15.0)                                          |                |
| Area deprivation index (ADI)* |                             |                                                                |                                                       | 0.142          |
| Quintile                      |                             |                                                                |                                                       |                |
| 1 (Least Deprived)            | 5,443 (20.2)                | 952 (20.2)                                                     | 4,491 (20.2)                                          |                |
| 2                             | 5,367 (19.9)                | 949 (20.1)                                                     | 4,418 (19.8)                                          |                |
| 3                             | 5,273 (19.5)                | 973 (20.6)                                                     | 4,300 (19.3)                                          |                |
| 4                             | 5,239 (19.4)                | 908 (19.2)                                                     | 4,331 (19.4)                                          |                |
| 5 (Most Deprived)             | 5,298 (19.6)                | 868 (18.4)                                                     | 4,430 (19.9)                                          |                |
| Missing                       | 372 (1.4)                   | 68 (1.4)                                                       | 304 (1.4)                                             |                |
| VA Frailty index (VA-FI)**    |                             |                                                                |                                                       | <0.001         |
| Non-frail (VA-FI ≤0.1)        | 9,358 (34.7)                | 2,110 (44.7)                                                   | 7,248 (32.5)                                          |                |
| Pre-frail (VA-FI >0.1-0.2)    | 6,573 (24.3)                | 1,263 (26.8)                                                   | 5,310 (23.8)                                          |                |



|                                    | <b>Total<br/>(n=26,992)</b> | <b>Test-<br/>positive<br/>COVID-19<br/>cases<br/>(n=4,718)</b> | <b>Test-<br/>negative<br/>controls<br/>(n=22,274)</b> | <b>P-value</b> |
|------------------------------------|-----------------------------|----------------------------------------------------------------|-------------------------------------------------------|----------------|
| Mildly frail (VA-FI >0.2-0.3)      | 4,497 (16.7)                | 671 (14.2)                                                     | 3,826 (17.2)                                          |                |
| Moderately frail (VA-FI >0.3-0.4)  | 3,004 (11.1)                | 361 (7.7)                                                      | 2,643 (11.9)                                          |                |
| Severely frail (VA-FI ≥0.5)        | 3,560 (13.2)                | 313 (6.6)                                                      | 3,247 (14.6)                                          |                |
| Healthcare exposures, 1 year prior | 9,141 (33.9)                | 865 (18.3)                                                     | 8,276 (37.2)                                          | <0.001         |
| Hospital admission                 |                             |                                                                |                                                       |                |
| Nursing home admission             | 1,596 (5.9)                 | 403 (8.5)                                                      | 1,193 (5.4)                                           | <0.001         |
| Intensive care unit admission      | 2,935 (10.9)                | 219 (4.6)                                                      | 2,716 (12.2)                                          | <0.001         |
| Emergency department visit         | 13,996 (51.9)               | 1,745 (37.0)                                                   | 12,251 (55.0)                                         | <0.001         |
| Primary care visit                 | 25,500 (94.5)               | 4,392 (93.1)                                                   | 21,108 (94.8)                                         | <0.001         |
| Charlson Comorbidity Index         |                             |                                                                |                                                       | <0.001         |
| 0                                  | 9,120 (33.8)                | 2,087 (44.2)                                                   | 7,033 (31.6)                                          |                |
| 1                                  | 5,106 (18.9)                | 969 (20.5)                                                     | 4,137 (18.6)                                          |                |
| 2                                  | 3,095 (11.5)                | 489 (10.4)                                                     | 2,606 (11.7)                                          |                |
| 3                                  | 2,571 (9.5)                 | 388 (8.2)                                                      | 2,183 (9.8)                                           |                |
| ≥ 4                                | 7,100 (26.3)                | 785 (16.6)                                                     | 6,315 (28.4)                                          |                |
| Immunocompromised***               | 8,125 (30.1)                | 977 (20.7)                                                     | 7,148 (32.1)                                          | <0.001         |
| Week of infection                  |                             |                                                                |                                                       | <0.001         |
| Sep 25–Sep 30,2023                 | 2,247 (8.3)                 | 337 (7.1)                                                      | 1,910 (8.6)                                           |                |

|                              | <b>Total<br/>(n=26,992)</b> | <b>Test-<br/>positive<br/>COVID-19<br/>cases<br/>(n=4,718)</b> | <b>Test-<br/>negative<br/>controls<br/>(n=22,274)</b> | <b>P-value</b> |
|------------------------------|-----------------------------|----------------------------------------------------------------|-------------------------------------------------------|----------------|
| Oct 01–Oct 07, 2023          | 1,312 (4.9)                 | 185 (3.9)                                                      | 1,127 (5.1)                                           |                |
| Oct 08–Oct 14, 2023          | 975 (3.6)                   | 131 (2.8)                                                      | 844 (3.8)                                             |                |
| Oct 15–Oct 21, 2023          | 1,157 (4.3)                 | 203 (4.3)                                                      | 954 (4.3)                                             |                |
| Oct 22–Oct 28, 2023          | 1,146 (4.3)                 | 165 (3.5)                                                      | 981 (4.4)                                             |                |
| Oct 29–Nov 04, 2023          | 1,096 (4.1)                 | 165 (3.5)                                                      | 931 (4.2)                                             |                |
| Nov 05–Nov 11, 2023          | 1,043 (3.9)                 | 137 (2.9)                                                      | 906 (4.1)                                             |                |
| Nov 12–Nov 18, 2023          | 1,292 (4.8)                 | 193 (4.1)                                                      | 1,099 (4.9)                                           |                |
| Nov 19–Nov 25, 2023          | 1,038 (3.8)                 | 172 (3.6)                                                      | 866 (3.9)                                             |                |
| Nov 26–Dec 02, 2023          | 1,670 (6.2)                 | 293 (6.2)                                                      | 1,377 (6.2)                                           |                |
| Dec 03–Dec 09, 2023          | 1,568 (5.8)                 | 288 (6.1)                                                      | 1,280 (5.7)                                           |                |
| Dec 10–Dec 16, 2023          | 1,671 (6.2)                 | 329 (7.0)                                                      | 1,342 (6.0)                                           |                |
| Dec 17–Dec 23, 2023          | 1,813 (6.7)                 | 387 (8.2)                                                      | 1,426 (6.4)                                           |                |
| Dec 24–Dec 30, 2023          | 1,474 (5.5)                 | 297 (6.3)                                                      | 1,177 (5.3)                                           |                |
| Dec 31, 2023–Jan 06, 2024    | 1,789 (6.6)                 | 391 (8.3)                                                      | 1,398 (6.3)                                           |                |
| Jan 07–Jan 13, 2024          | 1,830 (6.8)                 | 336 (7.1)                                                      | 1,494 (6.7)                                           |                |
| Jan 14–Jan 20, 2024          | 1,299 (4.8)                 | 259 (5.5)                                                      | 1,040 (4.7)                                           |                |
| Jan 21–Jan 27, 2024          | 1,607 (6.0)                 | 291 (6.2)                                                      | 1,316 (5.9)                                           |                |
| Jan 28–Jan 31, 2024          | 965 (3.6)                   | 159 (3.4)                                                      | 806 (3.6)                                             |                |
| Prior COVID-19 infection**** | 6,620 (24.5)                | 1,003 (21.3)                                                   | 5,617 (25.2)                                          | <0.001         |

|                                      | <b>Total<br/>(n=26,992)</b> | <b>Test-<br/>positive<br/>COVID-19<br/>cases<br/>(n=4,718)</b> | <b>Test-<br/>negative<br/>controls<br/>(n=22,274)</b> | <b>P-value</b> |
|--------------------------------------|-----------------------------|----------------------------------------------------------------|-------------------------------------------------------|----------------|
| Virtual visit (outpatient only)***** | 2,773 (10.3)                | 1,129 (23.9)                                                   | 1,644 (7.4)                                           | <0.001         |
| Current influenza vaccine            | 9,612 (35.6)                | 1,685 (35.7)                                                   | 7,927 (35.6)                                          | 0.87           |
| Pneumococcal vaccine in last 5 years | 9,940 (36.8)                | 1,589 (33.7)                                                   | 8,351 (37.5)                                          | <0.001         |

ARI= acute respiratory infection; ED/UC= emergency department/urgent care; VA= Veterans Affairs

Data are n (%) unless otherwise specified.

All ARI encounters within a 30-day window were considered a single ARI episode. If multiple encounter types occurred during the 30-day window, the highest level of care was used (hospitalization > ED/UC > outpatient).

\*The categories under “COVID vaccine status” were categorized as present or absent for each category

\*\*Area deprivation index (ADI) is a measure of socioeconomic disadvantage and was grouped into quintiles from least to most deprived neighborhoods (based on zip code).<sup>51</sup>

\*\*\*Frailty was defined using the ICD-10 updated Veterans Affairs Frailty Index (VA-FI) and categorized as non-frail (VA-FI ≤ 0.1), prefrail (>0.1–0.2), mildly frail (>0.2–0.3), moderately frail (>0.3–0.4), and severely frail (>0.4).<sup>52</sup>

\*\*\*\*Immunocompromised status was based on immunocompromising conditions in the year prior and immunosuppressive medications in the 90 days prior to the ARI episode based on a slightly modified algorithm that has been previously described.<sup>29</sup> Unlike the previously described algorithm, we used diagnosis codes to identify solid organ or hematopoietic stem cell transplantation and HIV/AIDS versus patient registries. Consistent with the previously described algorithm, we required one inpatient or two outpatient diagnosis code for an immunocompromising condition (leukemia, lymphoma, congenital immunodeficiencies, asplenia/hyposplenia, HIV/AIDS, and organ transplant) in the year prior and any immunosuppressive medication (alkylating agents, antibiotics, antimetabolites, antimitotics,

monoclonal antibodies, other, immune-modulating agents, TNF Alpha antagonist, and steroids) with an outpatient days supply or inpatient administration in the 90 days prior.

\*\*\*\*Prior COVID-19 infection was defined as any previous documented SARS-CoV-2 infection or no prior documented infection (yes or no).

\*\*\*\*Virtual visit was only assessed among those with an outpatient visit and defined as a virtual visit or not .

\*\*\*\*ICU admission was only assessed among those with a hospital admission and defined as admission to an ICU or not.

**Supplemental Table 6.** Demographics and clinical characteristics of acute respiratory infection episodes (hospitalization, ED/UC visits, outpatient visits) with SARS-CoV-2 testing, by vaccination status

| <b>Variable</b>                                                              | <b>Total<br/>(n=113,174)</b> | <b>Received<br/>BNT162b2<br/>XBB<br/>vaccine<br/>(n=7,324)</b> | <b>No XBB<br/>vaccine of<br/>any kind<br/>(n=105,850)</b> | <b>P-value</b> |
|------------------------------------------------------------------------------|------------------------------|----------------------------------------------------------------|-----------------------------------------------------------|----------------|
| COVID vaccine status                                                         | 29,907 (26.4)                | 5,626 (76.8)                                                   | 24,281 (22.9)                                             | <0.001         |
| ≥1 dose of BA.4/5-adapted bivalent vaccine                                   |                              |                                                                |                                                           |                |
| ≥3 doses of original wild-type mRNA vaccine but no bivalent-adapted vaccines | 29,463 (26.0)                | 1,262 (17.2)                                                   | 28,201 (26.6)                                             | <0.001         |
| ≥2 doses of original wild-type mRNA vaccine but no bivalent-adapted vaccines | 51,546 (45.6)                | 1,499 (20.5)                                                   | 50,047 (47.3)                                             | <0.001         |
| No original wild-type mRNA or bivalent-adapted or non-mRNA vaccines          | 24,747 (21.9)                | 106 (1.4)                                                      | 24,641 (23.3)                                             | <0.001         |
| Time since last non-XBB adapted vaccine, median days (IQR)                   | 670<br>(413–820)             | 433<br>(385–477)                                               | 691<br>(421–840)                                          | <0.001         |
| Age group                                                                    |                              |                                                                |                                                           | <0.001         |
| 18–64 years                                                                  | 54,563 (48.2)                | 1,811 (24.7)                                                   | 52,752 (49.8)                                             |                |
| 65–74 years                                                                  | 27,821 (24.6)                | 2,416 (33)                                                     | 25,405 (24)                                               |                |
| ≥75 years                                                                    | 30,790 (27.2)                | 3,097 (42.3)                                                   | 27,693 (26.2)                                             |                |
| Sex                                                                          |                              |                                                                |                                                           | <0.001         |
| Male                                                                         | 98,172 (86.7)                | 6,644 (90.7)                                                   | 91,528 (86.5)                                             |                |
| Female                                                                       | 15,002 (13.3)                | 680 (9.3)                                                      | 14,322 (13.5)                                             |                |
| Body mass index category                                                     |                              |                                                                |                                                           | <0.001         |
| Underweight (<18.5 kg/m <sup>2</sup> )                                       | 1,399 (1.2)                  | 64 (0.9)                                                       | 1,335 (1.3)                                               |                |

| <b>Variable</b>                                           | <b>Total<br/>(n=113,174)</b> | <b>Received<br/>BNT162b2<br/>XBB<br/>vaccine<br/>(n=7,324)</b> | <b>No XBB<br/>vaccine of<br/>any kind<br/>(n=105,850)</b> | <b>P-value</b> |
|-----------------------------------------------------------|------------------------------|----------------------------------------------------------------|-----------------------------------------------------------|----------------|
| Healthy weight (18.5–24.9 kg/m <sup>2</sup> )             | 34,083 (30.1)                | 2,252 (30.7)                                                   | 31,831 (30.1)                                             |                |
| Overweight (25–29.9 kg/m <sup>2</sup> )                   | 22,780 (20.2)                | 1,571 (21.5)                                                   | 21,209 (20)                                               |                |
| Obese ( $\geq$ 30 kg/m <sup>2</sup> )                     | 54,398 (48.3)                | 3,429 (46.8)                                                   | 50,969 (48.2)                                             |                |
| Region                                                    |                              |                                                                |                                                           | <0.001         |
| Midwest                                                   | 22,167 (19.6)                | 1,830 (25)                                                     | 20,337 (19.2)                                             |                |
| Northeast                                                 | 15,063 (13.3)                | 1,050 (14.3)                                                   | 14,013 (13.2)                                             |                |
| West                                                      | 21,933 (19.4)                | 1,458 (19.9)                                                   | 20,475 (19.3)                                             |                |
| South                                                     | 54,011 (47.7)                | 2,986 (40.8)                                                   | 51,025 (48.2)                                             |                |
| Race                                                      |                              |                                                                |                                                           | <0.001         |
| Black or African American                                 | 29,699 (26.2)                | 2,301 (31.4)                                                   | 27,398 (25.9)                                             |                |
| White                                                     | 71,345 (63.0)                | 4,337 (59.2)                                                   | 67,008 (63.3)                                             |                |
| Other race                                                | 12,130 (10.7)                | 686 (9.4)                                                      | 11,444 (10.8)                                             |                |
| Ethnicity                                                 |                              |                                                                |                                                           | <0.001         |
| Hispanic or Latino                                        | 10,527 (9.3)                 | 472 (6.4)                                                      | 10,055 (9.5)                                              |                |
| Not Hispanic or Latino                                    | 102,647<br>(90.7)            | 6,852 (93.6)                                                   | 95,795 (90.5)                                             |                |
| Smoking                                                   |                              |                                                                |                                                           | <0.001         |
| Current or former                                         | 58,062 (51.3)                | 4,122 (56.3)                                                   | 53,940 (51)                                               |                |
| Area deprivation index (ADI)<br>Quintile                  |                              |                                                                |                                                           | <0.001         |
| 1 (Least Deprived)                                        | 22,140 (19.6)                | 1,845 (25.2)                                                   | 20,295 (19.2)                                             |                |
| 2                                                         | 22,134 (19.6)                | 1,396 (19.1)                                                   | 20,738 (19.6)                                             |                |
| 3                                                         | 22,143 (19.6)                | 1,357 (18.5)                                                   | 20,786 (19.6)                                             |                |
| 4                                                         | 22,126 (19.6)                | 1,243 (17)                                                     | 20,883 (19.7)                                             |                |
| 5 (Most Deprived)                                         | 22,136 (19.6)                | 1,415 (19.3)                                                   | 20,721 (19.6)                                             |                |
| VA Frailty index (VA-FI)*<br>Non-frail (VA-FI $\leq$ 0.1) | 40,182 (35.5)                | 1,435 (19.6)                                                   | 38,747 (36.6)                                             | <0.001         |

| <b>Variable</b>                         | <b>Total<br/>(n=113,174)</b> | <b>Received<br/>BNT162b2<br/>XBB<br/>vaccine<br/>(n=7,324)</b> | <b>No XBB<br/>vaccine of<br/>any kind<br/>(n=105,850)</b> | <b>P-value</b> |
|-----------------------------------------|------------------------------|----------------------------------------------------------------|-----------------------------------------------------------|----------------|
| Pre-frail (VA-FI >0.1-0.2)              | 27,422 (24.2)                | 1,721 (23.5)                                                   | 25,701 (24.3)                                             |                |
| Mildly frail (VA-FI >0.2-0.3)           | 18,818 (16.6)                | 1,597 (21.8)                                                   | 17,221 (16.3)                                             |                |
| Moderately frail (VA-FI >0.3-0.4)       | 12,559 (11.1)                | 1,129 (15.4)                                                   | 11,430 (10.8)                                             |                |
| Severely frail (VA-FI $\geq$ 0.5)       | 14,193 (12.5)                | 1,442 (19.7)                                                   | 12,751 (12)                                               |                |
| Healthcare exposures, 1 year prior      |                              |                                                                |                                                           | <0.001         |
| Hospital admission                      | 32,067 (28.3)                | 2,599 (35.5)                                                   | 29,468 (27.8)                                             |                |
| Nursing home admission                  | 3,924 (3.5)                  | 325 (4.4)                                                      | 3,599 (3.4)                                               | <0.001         |
| Intensive care unit admission           | 8,825 (7.8)                  | 685 (9.4)                                                      | 8,140 (7.7)                                               | <0.001         |
| Emergency department visit              | 69,978 (61.8)                | 4,797 (65.5)                                                   | 65,181 (61.6)                                             | <0.001         |
| Primary care visit                      | 106,691<br>(94.3)            | 7,165 (97.8)                                                   | 99,526 (94)                                               | <0.001         |
| Charlson Comorbidity Index              |                              |                                                                |                                                           | <0.001         |
| 0                                       | 38,598 (34.1)                | 1,370 (18.7)                                                   | 37,228 (35.2)                                             |                |
| 1                                       | 21,698 (19.2)                | 1,268 (17.3)                                                   | 20,430 (19.3)                                             |                |
| 2                                       | 12,962 (11.5)                | 952 (13)                                                       | 12,010 (11.3)                                             |                |
| 3                                       | 10,833 (9.6)                 | 919 (12.5)                                                     | 9,914 (9.4)                                               |                |
| $\geq$ 4                                | 29,083 (25.7)                | 2,815 (38.4)                                                   | 26,268 (24.8)                                             |                |
| Immunocompromised**                     | 40,309 (35.6)                | 2,961 (40.4)                                                   | 37,348 (35.3)                                             | <0.001         |
| Medical History***                      |                              |                                                                |                                                           | <0.001         |
| Acute cerebrovascular disease           | 5,372 (4.7)                  | 467 (6.4)                                                      | 4,905 (4.6)                                               |                |
| Acute myocardial infarction             | 3,842 (3.4)                  | 301 (4.1)                                                      | 3,541 (3.3)                                               | <0.001         |
| Alcohol and substance related disorders | 28,011 (24.8)                | 1,672 (22.8)                                                   | 26,339 (24.9)                                             | <0.001         |
| Any cancer or malignancy                | 42,527 (37.6)                | 3,695 (50.5)                                                   | 38,832 (36.7)                                             | <0.001         |

| <b>Variable</b>                                          | <b>Total<br/>(n=113,174)</b> | <b>Received<br/>BNT162b2<br/>XBB<br/>vaccine<br/>(n=7,324)</b> | <b>No XBB<br/>vaccine of<br/>any kind<br/>(n=105,850)</b> | <b>P-value</b> |
|----------------------------------------------------------|------------------------------|----------------------------------------------------------------|-----------------------------------------------------------|----------------|
| Aortic and peripheral arterial embolism or thrombosis    | 440 (0.4)                    | 47 (0.6)                                                       | 393 (0.4)                                                 | <0.001         |
| Asthma                                                   | 10,024 (8.9)                 | 759 (10.4)                                                     | 9,265 (8.8)                                               | <0.001         |
| Benign prostatic hyperplasia                             | 23,037 (20.4)                | 2,201 (30.1)                                                   | 20,836 (19.7)                                             | <0.001         |
| Cardiac dysrhythmias                                     | 27,478 (24.3)                | 2,304 (31.5)                                                   | 25,174 (23.8)                                             | <0.001         |
| Chronic kidney disease                                   | 13,161 (11.6)                | 1,313 (17.9)                                                   | 11,848 (11.2)                                             | <0.001         |
| Chronic obstructive pulmonary disease and bronchiectasis | 26,259 (23.2)                | 2,247 (30.7)                                                   | 24,012 (22.7)                                             | <0.001         |
| Congestive heart failure                                 | 17,429 (15.4)                | 1,589 (21.7)                                                   | 15,840 (15)                                               | <0.001         |
| Coronary atherosclerosis and other heart disease         | 25,404 (22.4)                | 2,225 (30.4)                                                   | 23,179 (21.9)                                             | <0.001         |
| Delirium, dementia, and other cognitive disorders        | 9,559 (8.4)                  | 882 (12)                                                       | 8,677 (8.2)                                               | <0.001         |
| Diabetes with or without chronic complications           | 47,147 (41.7)                | 3,885 (53)                                                     | 43,262 (40.9)                                             | <0.001         |
| Epilepsy                                                 | 3,142 (2.8)                  | 228 (3.1)                                                      | 2,914 (2.8)                                               | 0.070          |
| Human immunodeficiency virus (HIV) infection             | 1,271 (1.1)                  | 140 (1.9)                                                      | 1,131 (1.1)                                               | <0.001         |
| Hypertension                                             | 66,411 (58.7)                | 5,339 (72.9)                                                   | 61,072 (57.7)                                             | <0.001         |
| Influenza                                                | 1,413 (1.2)                  | 65 (0.9)                                                       | 1,348 (1.3)                                               | 0.004          |
| Liver diseases                                           | 10,877 (9.6)                 | 827 (11.3)                                                     | 10,050 (9.5)                                              | <0.001         |
| Mental health conditions                                 | 57,479 (50.8)                | 3,571 (48.8)                                                   | 53,908 (50.9)                                             | <0.001         |
| Osteoarthritis                                           | 23,617 (20.9)                | 2,105 (28.7)                                                   | 21,512 (20.3)                                             | <0.001         |
| Peripheral and visceral atherosclerosis                  | 9,699 (8.6)                  | 926 (12.6)                                                     | 8,773 (8.3)                                               | <0.001         |
| Pneumonia                                                | 9,596 (8.5)                  | 774 (10.6)                                                     | 8,822 (8.3)                                               | <0.001         |
| Pulmonary heart disease                                  | 7,598 (6.7)                  | 674 (9.2)                                                      | 6,924 (6.5)                                               | <0.001         |



| <b>Variable</b>                 | <b>Total<br/>(n=113,174)</b> | <b>Received<br/>BNT162b2<br/>XBB<br/>vaccine<br/>(n=7,324)</b> | <b>No XBB<br/>vaccine of<br/>any kind<br/>(n=105,850)</b> | <b>P-value</b> |
|---------------------------------|------------------------------|----------------------------------------------------------------|-----------------------------------------------------------|----------------|
| Rheumatoid arthritis            | 2,273 (2.0)                  | 220 (3)                                                        | 2,053 (1.9)                                               | <0.001         |
| Septicemia                      | 4,805 (4.2)                  | 390 (5.3)                                                      | 4,415 (4.2)                                               | <0.001         |
| Thyroid disorder                | 14,098 (12.5)                | 1,113 (15.2)                                                   | 12,985 (12.3)                                             | <0.001         |
| Tuberculosis                    | 237 (0.2)                    | 21 (0.3)                                                       | 216 (0.2)                                                 | 0.134          |
| Week of infection               |                              |                                                                |                                                           | <0.001         |
| Sep 25–Sep 30, 2023             | 5,503 (4.9)                  | < 5 (<0.1)                                                     | 5,503 (5.2)                                               |                |
| Oct 01–Oct 07, 2023             | 4,834 (4.3)                  | 6 (0.1)                                                        | 4,828 (4.6)                                               |                |
| Oct 08–Oct 14, 2023             | 4,358 (3.9)                  | 7 (0.1)                                                        | 4,351 (4.1)                                               |                |
| Oct 15–Oct 21, 2023             | 4,707 (4.2)                  | 31 (0.4)                                                       | 4,676 (4.4)                                               |                |
| Oct 22–Oct 28, 2023             | 4,624 (4.1)                  | 74 (1)                                                         | 4,550 (4.3)                                               |                |
| Oct 29–Nov 04, 2023             | 4,453 (3.9)                  | 121 (1.7)                                                      | 4,332 (4.1)                                               |                |
| Nov 05–Nov 11, 2023             | 4,741 (4.2)                  | 201 (2.7)                                                      | 4,540 (4.3)                                               |                |
| Nov 12–Nov 18, 2023             | 5,622 (5.0)                  | 291 (4)                                                        | 5,331 (5)                                                 |                |
| Nov 19–Nov 25, 2023             | 5,155 (4.6)                  | 320 (4.4)                                                      | 4,835 (4.6)                                               |                |
| Nov 26–Dec 02, 2023             | 6,746 (6.0)                  | 474 (6.5)                                                      | 6,272 (5.9)                                               |                |
| Dec 03–Dec 09, 2023             | 6,855 (6.1)                  | 524 (7.2)                                                      | 6,331 (6)                                                 |                |
| Dec 10–Dec 16, 2023             | 6,959 (6.1)                  | 568 (7.8)                                                      | 6,391 (6)                                                 |                |
| Dec 17–Dec 23, 2023             | 8,160 (7.2)                  | 680 (9.3)                                                      | 7,480 (7.1)                                               |                |
| Dec 24–Dec 30, 2023             | 8,366 (7.4)                  | 792 (10.8)                                                     | 7,574 (7.2)                                               |                |
| Dec 31, 2023–Jan 06, 2024       | 8,814 (7.8)                  | 871 (11.9)                                                     | 7,943 (7.5)                                               |                |
| Jan 07–Jan 13, 2024             | 7,624 (6.7)                  | 759 (10.4)                                                     | 6,865 (6.5)                                               |                |
| Jan 14–Jan 20, 2024             | 5,663 (5.0)                  | 579 (7.9)                                                      | 5,084 (4.8)                                               |                |
| Jan 21–Jan 27, 2024             | 6,316 (5.6)                  | 623 (8.5)                                                      | 5,693 (5.4)                                               |                |
| Jan 28–Jan 31, 2024             | 3,674 (3.2)                  | 403 (5.5)                                                      | 3,271 (3.1)                                               |                |
| Prior COVID-19 infection        | 31,195 (27.6)                | 1,936 (26.4)                                                   | 29,259 (27.6)                                             | 0.025          |
| Virtual visit (outpatient only) | 2,773 (10.3)                 | 204 (11.1)                                                     | 2,569 (10.2)                                              | 0.221          |

| Variable                             | Total<br>(n=113,174) | Received<br>BNT162b2<br>XBB<br>vaccine<br>(n=7,324) | No XBB<br>vaccine of<br>any kind<br>(n=105,850) | P-value |
|--------------------------------------|----------------------|-----------------------------------------------------|-------------------------------------------------|---------|
| ICU admission (hospitalized only)    | 4,955 (20.5)         | 370 (20.2)                                          | 4,585 (20.5)                                    | 0.726   |
| Current influenza vaccine            | 39,077 (34.5)        | 6,779 (92.6)                                        | 32,298 (30.5)                                   | <0.001  |
| Pneumococcal vaccine in last 5 years | 41,032 (36.3)        | 3,801 (51.9)                                        | 37,231 (35.2)                                   | <0.001  |

ARI= acute respiratory infection; ED/UC= emergency department/urgent care; VA= Veterans Affairs

Data are n (%) unless otherwise specified.

All ARI encounters within a 30-day window were considered a single ARI episode. If multiple encounter types occurred during the 30-day window, the highest level of care was used (hospitalization > ED/UC > outpatient).

\*VA Frailty index was categorized as non-frail (VA-FI ≤ 0.1), prefrail (>0.1–0.2), mildly frail (>0.2–0.3), moderately frail (>0.3–0.4), and severely frail (>0.4)

\*\*Immunocompromised status was based on immunocompromising conditions in the year prior and immunosuppressive medications in the 90 days prior to the ARI episode based on a slightly modified algorithm that has been previously described. (Tartof SY, et al. Lancet Reg Health Am. 2022;9:100198.) Unlike the previously described algorithm, we used diagnosis codes to identify solid organ or hematopoietic stem cell transplantation and HIV/AIDS versus patient registries. Consistent with the previously described algorithm, we required one inpatient or two outpatient diagnosis code for an immunocompromising condition (leukemia, lymphoma, congenital immunodeficiencies, asplenia/hyposplenia, HIV/AIDS, and organ transplant) in the year prior and any immunosuppressive medication (alkylating agents, antibiotics, antimetabolites, antimitotics, monoclonal antibodies, other, immune-modulating agents, TNF Alpha antagonist, and steroids) with an outpatient days supply or inpatient administration in the 90 days prior.

\*\*\*Medical history included underlying conditions and diagnoses in the year prior to the ARI episode, identified using international classification of diseases (ICD)-10 codes.

**Supplemental Table 7.** Adjusted vaccine effectiveness of the BNT162b2 XBB vaccine for hospitalization, ED/UC visits, and outpatient visits by age group

| Outcome          | Age $\geq$ 65 years<br>(n = 58,611) |                                           | Age <65 years<br>(n = 54,563) |                                           |
|------------------|-------------------------------------|-------------------------------------------|-------------------------------|-------------------------------------------|
|                  | VE (95% CI)                         | Median (IQR)<br>days since XBB<br>vaccine | VE (95% CI)                   | Median (IQR)<br>days since XBB<br>vaccine |
| Hospitalization  | 41 (32–50)                          | 54 (33–74)                                | 58 (33–73)                    | 50 (34–67)                                |
| ED/UC visit      | 35 (27–43)                          | 56 (36–77)                                | 48 (37–57)                    | 54 (35–74)                                |
| Outpatient visit | 24 (9–36)                           | 53 (35–76)                                | 34 (14–50)                    | 51 (33–75)                                |

CI= confidence interval; ED/UC= emergency department/urgent care; IQR= interquartile range; VA= Veterans Affairs; VE = vaccine effectiveness

Compared the odds of receiving a BNT162b2 XBB vaccine between SARS-CoV-2 positive cases and SARS-CoV-2 negative controls. Adjusted for week of ARI episode, age, sex, race, ethnicity, BMI category, Charlson Comorbidity Index, receipt of 2023–2024 influenza vaccine, receipt of pneumococcal vaccine in the past 5 years, interactions with healthcare systems in the year prior, previous SARS-CoV-2 infection, smoking status, immunocompromised status, and Census region.

**Supplemental Table 8.** Adjusted vaccine effectiveness of the BNT162b2 XBB vaccine for hospitalization, ED/UC visits, and outpatient visits by immunocompromised status

| Outcome          | Immunocompromised<br>(n = 40,309) |                                           | Not Immunocompromised<br>(n = 72,865) |                                           |
|------------------|-----------------------------------|-------------------------------------------|---------------------------------------|-------------------------------------------|
|                  | VE (95% CI)                       | Median (IQR)<br>days since XBB<br>vaccine | VE (95% CI)                           | Median (IQR)<br>days since XBB<br>vaccine |
| Hospitalization  | 33 (16–47)                        | 52 (33–73)                                | 49 (38–58)                            | 54 (34–74)                                |
| ED/UC visit      | 34 (22–45)                        | 55 (35–74)                                | 42 (34–49)                            | 56 (36–77)                                |
| Outpatient visit | 40 (19–55)                        | 54 (35–77)                                | 22 (8–34)                             | 52 (34–75)                                |

CI= confidence interval; ED/UC= emergency department/urgent care; IQR= interquartile range; VA= Veterans Affairs; VE = vaccine effectiveness

Compared the odds of receiving a BNT162b2 XBB vaccine between SARS-CoV-2 positive cases and SARS-CoV-2 negative controls. Adjusted for week of ARI episode, age, sex, race, ethnicity, BMI category, Charlson Comorbidity Index, receipt of 2023–2024 influenza vaccine, receipt of pneumococcal vaccine in the past 5 years, interactions with healthcare systems in the year prior, previous SARS-CoV-2 infection, smoking status, immunocompromised status, and Census region.

**Supplemental Table 9.** Adjusted vaccine effectiveness of the BNT162b2 XBB vaccine for hospitalization, ED/UC visits, and outpatient visits by obesity classification

| Outcome          | Obese<br>(n = 54,398) |                                           | Non-obese<br>(n = 58,262) |                                           |
|------------------|-----------------------|-------------------------------------------|---------------------------|-------------------------------------------|
|                  | VE (95% CI)           | Median (IQR)<br>days since XBB<br>vaccine | VE (95% CI)               | Median (IQR)<br>days since XBB<br>vaccine |
| Hospitalization  | 50 (36–61)            | 52 (33–74)                                | 39 (27–49)                | 53 (34–73)                                |
| ED/UC visit      | 44 (35–52)            | 56 (36–76)                                | 35 (25–43)                | 56 (36–76)                                |
| Outpatient visit | 34 (19–47)            | 54 (35–76)                                | 21 (3–35)                 | 52 (34–76)                                |

CI= confidence interval; ED/UC= emergency department/urgent care; IQR= interquartile range; VA= Veterans Affairs; VE = vaccine effectiveness

Compared the odds of receiving a BNT162b2 XBB vaccine between SARS-CoV-2 positive cases and SARS-CoV-2 negative controls. Adjusted for week of ARI episode, age, sex, race, ethnicity, BMI category, Charlson Comorbidity Index, receipt of 2023–2024 influenza vaccine, receipt of pneumococcal vaccine in the past 5 years, interactions with healthcare systems in the year prior, previous SARS-CoV-2 infection, smoking status, immunocompromised status, and Census region.

**Supplemental Table 10.** Adjusted vaccine effectiveness of the BNT162b2 XBB vaccine for hospitalization, ED/UC visits, and outpatient visits by smoking status

| Outcome          | Current or former smoker<br>(n = 58,062) |                                           | Non-smoker<br>(n = 55,112) |                                           |
|------------------|------------------------------------------|-------------------------------------------|----------------------------|-------------------------------------------|
|                  | VE (95% CI)                              | Median (IQR)<br>days since XBB<br>vaccine | VE (95% CI)                | Median (IQR)<br>days since XBB<br>vaccine |
| Hospitalization  | 38 (26–48)                               | 53 (34–73)                                | 51 (38–62)                 | 53 (33–75)                                |
| ED/UC visit      | 43 (35–51)                               | 55 (35–76)                                | 34 (24–43)                 | 56 (37–77)                                |
| Outpatient visit | 32 (17–45)                               | 52 (33–74)                                | 22 (4–36)                  | 54 (36–77)                                |

CI= confidence interval; ED/UC= emergency department/urgent care; IQR= interquartile range; VA= Veterans Affairs; VE = vaccine effectiveness

Compared the odds of receiving a BNT162b2 XBB vaccine between SARS-CoV-2 positive cases and SARS-CoV-2 negative controls. Adjusted for week of ARI episode, age, sex, race, ethnicity, BMI category, Charlson Comorbidity Index, receipt of 2023–2024 influenza vaccine, receipt of pneumococcal vaccine in the past 5 years, interactions with healthcare systems in the year prior, previous SARS-CoV-2 infection, smoking status, immunocompromised status, and Census region.

**Supplemental Table 11.** Adjusted vaccine effectiveness of the BNT162b2 XBB vaccine for hospitalization, ED/UC visits, and outpatient visits among those with 1 or more doses of BA.4/5-adapted bivalent vaccine

| <b>Outcome</b>                | <b>VE (95% CI)</b> |
|-------------------------------|--------------------|
| Hospitalization <sup>1</sup>  | 45 (34-54)         |
| ED/UC visit <sup>2</sup>      | 44 (37-51)         |
| Outpatient visit <sup>3</sup> | 26 (11-39)         |

CI= confidence interval; ED/UC= emergency department/urgent care; VE= vaccine effectiveness

Compared the odds of receiving a BNT162b2 XBB vaccine between SARS-CoV-2 positive cases and SARS-CoV-2 negative controls. Adjusted for week of ARI episode, age, sex, race, ethnicity, BMI category, Charlson Comorbidity Index, receipt of 2023-2024 influenza vaccine, receipt of pneumococcal vaccine in the past 5 years, interactions with healthcare systems in the year prior, previous SARS-CoV-2 infection, smoking status, immunocompromised status, and Census region.

<sup>1</sup> Stratified analysis: 200 XBB / 1,443 cases (13.9%), 1,194 XBB / 6,373 controls (18.7%). Non-stratified analysis: 257 XBB / 4,561 cases (5.6%), 1,579 XBB / 19,645 controls (8.0%).

<sup>2</sup> Stratified analysis: 387 XBB / 2,682 cases (14.4%), 2,439 XBB / 12,074 controls (20.2%). Non-stratified analysis: 503 XBB / 11,244 cases (4.5%), 3,149 XBB / 50,732 controls (6.2%).

<sup>3</sup> Stratified analysis: 204 XBB / 1,191 cases (17.1%), 1,202 XBB / 6,144 controls (19.6%). Non-stratified analysis: 259 XBB / 4,718 cases (5.5%), 1,577 XBB / 22,274 controls (7.1%).

**Supplemental Table 12.** Adjusted vaccine effectiveness of the BNT162b2 XBB vaccine for hospitalization, ED/UC visits, and outpatient visits among those with 3 or more doses of original wild-type mRNA but no bivalent-adapted vaccines

| <b>Outcome</b>                | <b>VE (95% CI)</b> |
|-------------------------------|--------------------|
| Hospitalization <sup>1</sup>  | 56 (36-69)         |
| ED/UC visit <sup>2</sup>      | 41 (25-53)         |
| Outpatient visit <sup>3</sup> | 38 (11-57)         |

CI= confidence interval; ED/UC= emergency department/urgent care; VE= vaccine effectiveness

Compared the odds of receiving a BNT162b2 XBB vaccine between SARS-CoV-2 positive cases and SARS-CoV-2 negative controls. Adjusted for week of ARI episode, age, sex, race, ethnicity, BMI category, Charlson Comorbidity Index, receipt of 2023-2024 influenza vaccine, receipt of pneumococcal vaccine in the past 5 years, interactions with healthcare systems in the year prior, previous SARS-CoV-2 infection, smoking status, immunocompromised status, and Census region.

<sup>1</sup> Stratified analysis: 36 XBB / 1,263 cases (2.8%), 296 XBB / 5,549 controls (5.3%). Non-stratified analysis: 257 XBB / 4,561 cases (5.6%), 1,579 XBB / 19,645 controls (8.0%).

<sup>2</sup> Stratified analysis: 87 XBB / 3,020 cases (2.9%), 540 XBB / 12,698 controls (4.2%). Non-stratified analysis: 503 XBB / 11,244 cases (4.5%), 3,149 XBB / 50,732 controls (6.2%).

<sup>3</sup> Stratified analysis: 39 XBB / 1,229 cases (3.2%), 264 XBB / 5,704 controls (4.6%). Non-stratified analysis: 259 XBB / 4,718 cases (5.5%), 1,577 XBB / 22,274 controls (7.1%).



**Supplemental Figure 1.** Study timeframes for assessing exclusion, exposure, covariates and acute respiratory infection episodes

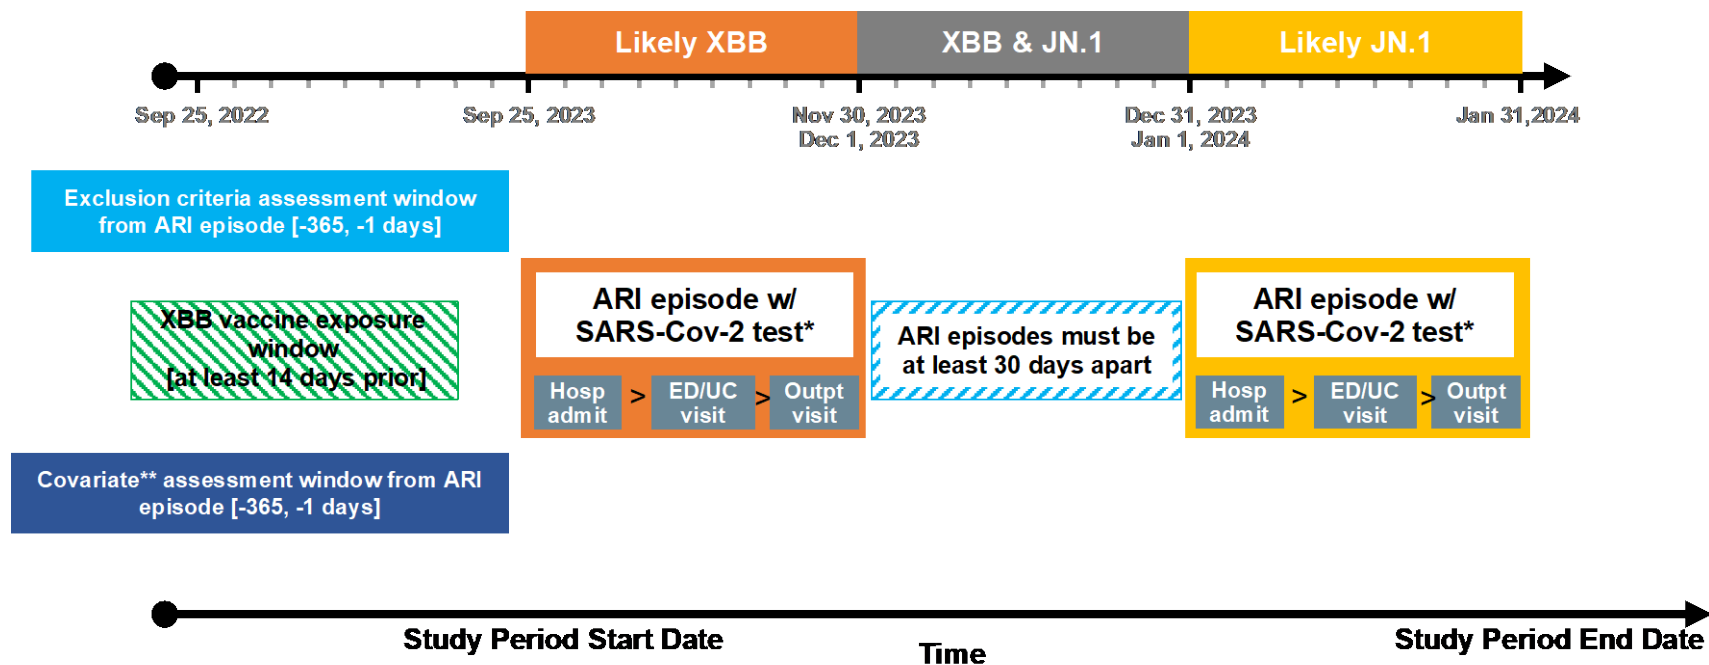

All ARI encounters (hospitalization, emergency department / urgent care (ED/UC) visit, or outpatient visit) with a SARS-Cov-2 test within a 30-day window were considered a single ARI episode from September 25, 2023 through January 31, 2024.

- Likely XBB period defined as September 25, 2023 through November 30, 2023.
- XBB and JN.1 co-circulation period defined as December 1, 2023 through December 31, 2023.
- Likely JN.1 period defined as January 1, 2024 through January 31, 2024.

ARI= acute respiratory infection; ED/UC= emergency department/urgent care;

\* The encounter at the highest level of care (i.e., hospitalization > ED/UC visit > outpatient visit) was selected for inclusion.

\*\* Covariates assessed in the year prior for each ARI episode.

**Supplemental Figure 2.** Cumulative frequency of BNT162b2 XBB vaccination and ARI episodes over time by study time period

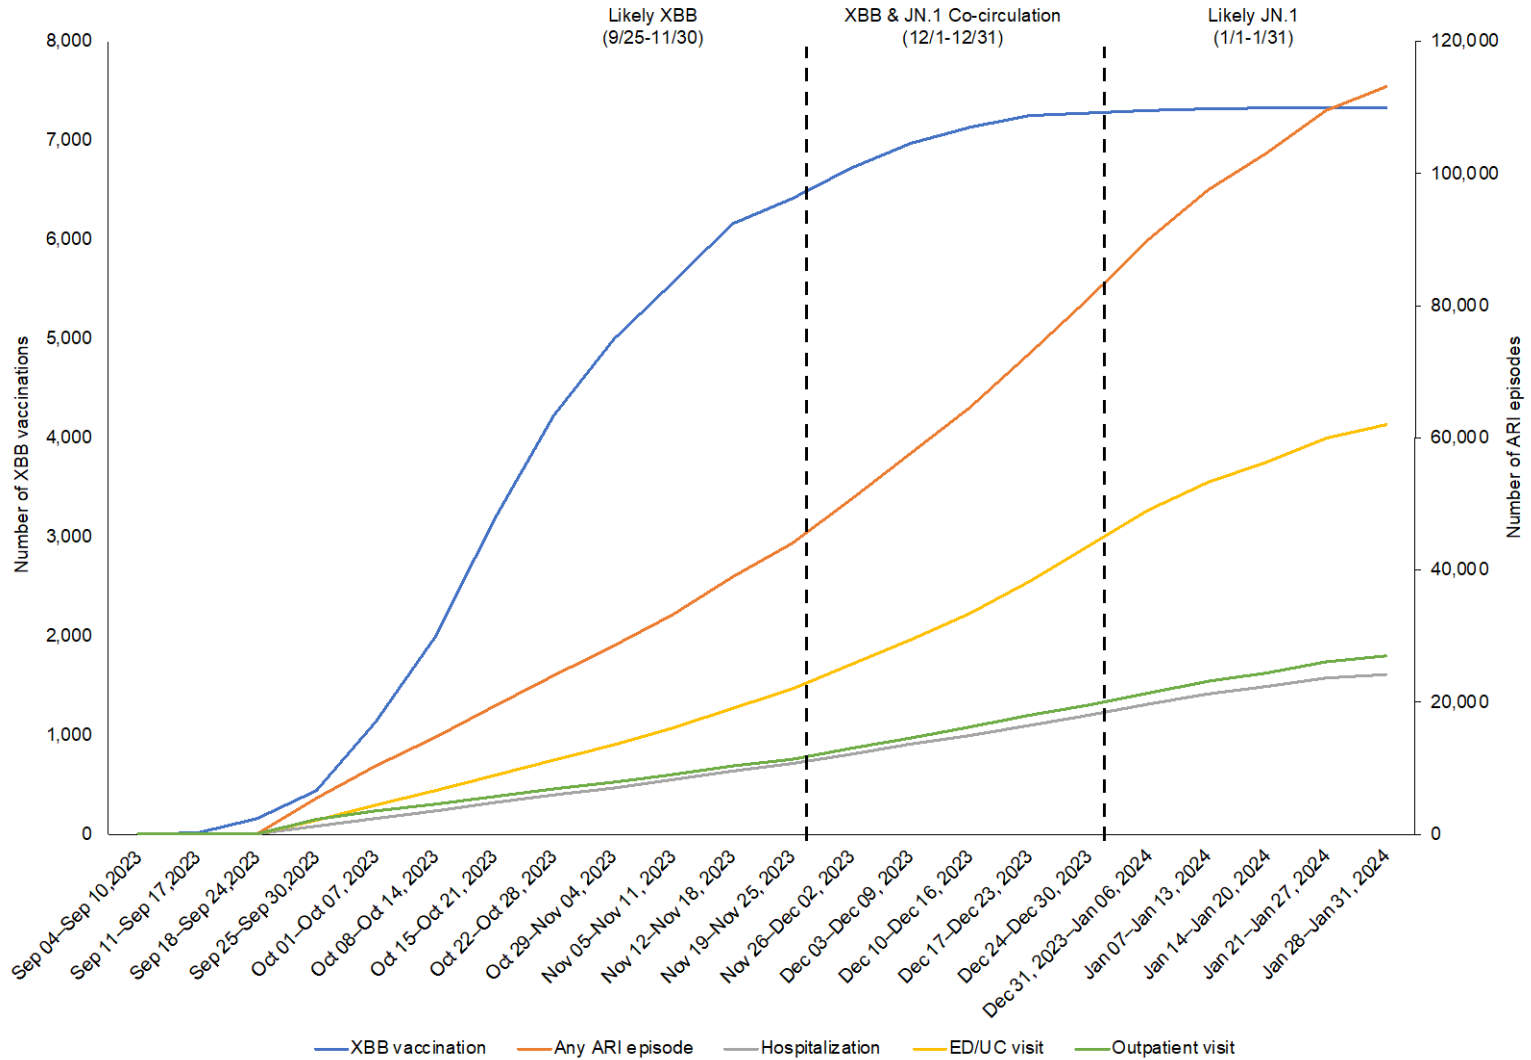

ARI= acute respiratory infection; ED/UC= emergency department/urgent care
